# Supplementary material for: Sixteen-week multicentre randomised controlled trial to study the effect of the consumption of an oat beta-glucan-enriched bread versus a whole-grain wheat bread on glycaemic control among persons with pre-diabetes: a study protocol of the CarbHealth study
Source: PubMed Central journal article supplement — BMJ Open. 2022 Aug 23;12(8):e062066. doi: 10.1136/bmjopen-2022-062066 (PMC9403155; doi:10.1136/bmjopen-2022-062066), 2022-08-23
Supplement: bmjopen-2022-062066.draft_revisions.pdf [file bmjopen-2022-062066.draft_revisions.pdf]

# BMJ Open

BMJ Open is committed to open peer review. As part of this commitment we make the peer review history of every article we publish publicly available.

When an article is published we post the peer reviewers' comments and the authors' responses online. We also post the versions of the paper that were used during peer review. These are the versions that the peer review comments apply to.

The versions of the paper that follow are the versions that were submitted during the peer review process. They are not the versions of record or the final published versions. They should not be cited or distributed as the published version of this manuscript.

BMJ Open is an open access journal and the full, final, typeset and author-corrected version of record of the manuscript is available on our site with no access controls, subscription charges or pay-per-view fees (<http://bmjopen.bmj.com>).

If you have any questions on BMJ Open's open peer review process please email [info.bmjopen@bmj.com](mailto:info.bmjopen@bmj.com)

# BMJ Open

## A 16-week multicenter randomized controlled trial to study the effect of the consumption of an oat beta-glucan enriched bread versus a wholegrain wheat bread on glycemic control among persons with pre-diabetes – The CarbHealth study

|                               |                                                                                                                                                                                                                                                                                                                                                                                                                                                                                                                                                                                                                                                                                                                                                                                                                                                                                                                                                                                                                                                                                                                                                                                             |
|-------------------------------|---------------------------------------------------------------------------------------------------------------------------------------------------------------------------------------------------------------------------------------------------------------------------------------------------------------------------------------------------------------------------------------------------------------------------------------------------------------------------------------------------------------------------------------------------------------------------------------------------------------------------------------------------------------------------------------------------------------------------------------------------------------------------------------------------------------------------------------------------------------------------------------------------------------------------------------------------------------------------------------------------------------------------------------------------------------------------------------------------------------------------------------------------------------------------------------------|
| Journal:                      | <i>BMJ Open</i>                                                                                                                                                                                                                                                                                                                                                                                                                                                                                                                                                                                                                                                                                                                                                                                                                                                                                                                                                                                                                                                                                                                                                                             |
| Manuscript ID                 | bmjopen-2022-062066                                                                                                                                                                                                                                                                                                                                                                                                                                                                                                                                                                                                                                                                                                                                                                                                                                                                                                                                                                                                                                                                                                                                                                         |
| Article Type:                 | Protocol                                                                                                                                                                                                                                                                                                                                                                                                                                                                                                                                                                                                                                                                                                                                                                                                                                                                                                                                                                                                                                                                                                                                                                                    |
| Date Submitted by the Author: | 21-Feb-2022                                                                                                                                                                                                                                                                                                                                                                                                                                                                                                                                                                                                                                                                                                                                                                                                                                                                                                                                                                                                                                                                                                                                                                                 |
| Complete List of Authors:     | Hjorth, Therese; Chalmers University of Technology, Department of Biology and Biological Engineering<br>Schadow, Alena; Paderborn University<br>Revheim, Ingrid; University of Bergen, Department of Clinical Medicine<br>Spielau, Ulrike; University of Bergen, Department of Clinical Medicine; Leipzig University<br>Thomassen, Lise M.; University of Bergen, Department of Clinical Medicine<br>Meyer, Klara; Leipzig University<br>Piotrowski, Katja; Leipzig University<br>Rosendahl-Riise, Hanne; University of Bergen, Department of Clinical Medicine<br>Rieder, Anne; Norwegian Institute of Food Fisheries and Aquaculture Research<br>Varela, Paula; Norwegian Institute of Food Fisheries and Aquaculture Research<br>Koerner, Antje; Leipzig University<br>Landberg, Rikard; Division of Food and Nutrition Science, Department of Biology and Biological Engineering<br>Lysne, Vegard ; Haukeland University Hospital, Department of Heart Disease; University of Bergen, Department of Clinical Science<br>Ballance, Simon; Norwegian Institute of Food Fisheries and Aquaculture Research<br>Buyken, Anette; Paderborn University<br>Dierkes, Jutta; Paderborn University |
| Keywords:                     | General diabetes < DIABETES & ENDOCRINOLOGY, PUBLIC HEALTH, Clinical trials < THERAPEUTICS                                                                                                                                                                                                                                                                                                                                                                                                                                                                                                                                                                                                                                                                                                                                                                                                                                                                                                                                                                                                                                                                                                  |
|                               |                                                                                                                                                                                                                                                                                                                                                                                                                                                                                                                                                                                                                                                                                                                                                                                                                                                                                                                                                                                                                                                                                                                                                                                             |

SCHOLARONE™  
Manuscripts

1  
2  
3  
4  
5  
6  
7  
8  
9  
10  
11  
12  
13  
14  
15  
16  
17  
18  
19  
20  
21  
22  
23  
24  
25  
26  
27  
28  
29  
30  
31  
32  
33  
34  
35  
36  
37  
38  
39  
40  
41  
42  
43  
44  
45  
46  
47  
48  
49  
50  
51  
52  
53  
54  
55  
56  
57  
58  
59  
60

## **A 16-week multicenter randomized controlled trial to study the effect of the consumption of an oat beta-glucan enriched bread versus a wholegrain wheat bread on glycemic control among persons with pre-diabetes – The CarbHealth study**

**Authors: The CarbHealth-consortium**

**Therese Hjorth<sup>1✉</sup>, Alena Schadow<sup>2</sup>, Ingrid Revheim<sup>3</sup>, Ulrike Spielau<sup>4,5</sup>, Lise M. Thomassen<sup>3</sup>  
Klara Meyer<sup>5</sup>, Katja Piotrowski<sup>5</sup>, Hanne Rosendahl-Riise<sup>4</sup>, Anne Rieder<sup>6</sup>, Paula Varela<sup>6</sup>  
Antje Koerner<sup>5</sup>, Rikard Landberg<sup>1</sup>, Vegard Lysne<sup>7,8</sup>, Simon Ballance<sup>6</sup>, Anette Buyken<sup>2</sup>, Jutta  
Dierkes<sup>2</sup>**

<sup>1</sup> Chalmers University of Technology, Department of Biology and Biological Engineering, Division of Food and Nutrition Science. Gothenburg, Sweden.

<sup>2</sup> Institute of Nutrition, Consumption and Health, Faculty of Natural Sciences, Paderborn University, Germany

<sup>3</sup> Centre for Nutrition, Department of Clinical Medicine, University of Bergen, Bergen, Norway

<sup>4</sup> Mohn Nutrition Research Laboratory and Centre for Nutrition, Department of Clinical Medicine, University of Bergen, Bergen, Norway

<sup>5</sup> Center for Pediatric Research (CPL), Hospital for Children and Adolescents, Medical Faculty, Leipzig University, Leipzig, Germany

<sup>6</sup> Nofima AS, Norwegian Institute of Food, Fisheries and Aquaculture Research, Ås, Norway

<sup>7</sup> Department of Heart Disease, Haukeland University Hospital, Bergen, Norway

<sup>8</sup> Mohn Nutrition Research Laboratory and Centre for Nutrition, Department of Clinical Science, University of Bergen, Bergen, Norway

✉Corresponding author

Therese Hjorth

Kemigården 4

412 39 Gothenburg, Sweden

Telephone: +46 0723 619 444

E-mail: Therese.Hjorth@chalmers.se

1  
2  
3  
4  
5 Wordcount abstract: 239

6  
7 Wordcount manuscript: 4212

8  
9  
10 Therese Hjorth, Corresponding author: [Therese.hjorth@chalmers.se](mailto:Therese.hjorth@chalmers.se)

11 Alena Schadow: [alena.marie.schadow@uni-paderborn.de](mailto:alena.marie.schadow@uni-paderborn.de)

12 Ingrid Revheim: [Ingrid.Revheim@uib.no](mailto:Ingrid.Revheim@uib.no)

13 Ulrike Spielau: [Ulrike.Spielau@uib.no](mailto:Ulrike.Spielau@uib.no)

14 Lise M. Thomassen: [lise.thomassen@uib.no](mailto:lise.thomassen@uib.no)

15 Klara Meyer: [klara.meyer@medizin.uni-leipzig.de](mailto:klara.meyer@medizin.uni-leipzig.de)

16 Katja Piotrowski: [katja.piotrowski@medizin.uni-leipzig.de](mailto:katja.piotrowski@medizin.uni-leipzig.de)

17 Hanne Rosendahl-Riise: [Hanne.Rosendahl-Riise@uib.no](mailto:Hanne.Rosendahl-Riise@uib.no)

18 Anne Rieder: [anne.rieder@nofima.no](mailto:anne.rieder@nofima.no)

19 Paula Varela: [paula.varela.tomasco@nofima.no](mailto:paula.varela.tomasco@nofima.no)

20 Antje Koerner: [antje.koerner@medizin.uni-leipzig.de](mailto:antje.koerner@medizin.uni-leipzig.de)

21 Rikard Landberg: [Rikard.landberg@chalmers.se](mailto:Rikard.landberg@chalmers.se)

22 Vegard Lysne: [vegard.lysne@uib.no](mailto:vegard.lysne@uib.no)

23 Simon Ballance: [simon.ballance@nofima.no](mailto:simon.ballance@nofima.no)

24 Anette Buyken: [anette.buyken@uni-paderborn.de](mailto:anette.buyken@uni-paderborn.de)

25 Jutta Dierkes: [Jutta.Dierkes@uib.no](mailto:Jutta.Dierkes@uib.no)

26  
27  
28  
29  
30  
31  
32  
33  
34  
35  
36  
37  
38  
39  
40  
41  
42  
43  
44  
45  
46  
47  
48  
49  
50  
51  
52  
53  
54  
55  
56  
57  
58  
59  
60

## Abstract

**Introduction** In 2012, the estimated global prevalence of pre-diabetes was 280 million, and the prevalence is expected to rise to 400 million by 2030. Oat-based foods are a good source of beta-glucans, which have been shown to lower postprandial blood glucose. Studies to evaluate the effectiveness of the long-term intake of beta-glucan-enriched bread as part of a habitual diet among individuals with prediabetes are needed. Therefore, we designed a multicenter intervention study in adults with pre-diabetes to investigate the effects of consumption of an oat-derived beta-glucan-enriched bread as part of a normal diet on HbA1c in comparison to consumption of a wholegrain wheat bread.

**Method and analysis** The CarbHealth trial is a multi-center double-blind randomized controlled 16-week dietary intervention trial in participants 40-70 years of age with a BMI  $\geq 27$  kg/m<sup>2</sup> and HbA1c 35-50 mmol/mol. The study is conducted at four universities located in Norway, Sweden and Germany and uses intervention breads specifically designed for the trial by Nofima AS. The aim is to recruit 250 participants. The primary outcome is the difference in HbA1c between the intervention and the control group. The main analysis will include intervention group, study center, and baseline HbA1c as independent variables in an ANCOVA-model.

**Ethics and dissemination** The study protocol was approved by respective ethic authorities in participating countries. The results of the study will be communicated through publication in international scientific journals and presentations at (inter)national conferences.

**Trial registration number** Clinical trials: NCT04994327.

## Article summary

### Strengths and limitations of this study

- The multicenter design allows us to recruit the required 250 participants, as it would be a difficult undertaking for one study center alone.
- The multicenter study also takes advantage of the expertise of different groups, thus adding microbiota research, chronotype and continuous glucose measurements as well as consumer acceptance to the study outcomes.
- Furthermore, collaboration with food technologists that were able to design, produce and extensively characterize a beta-glucan-enriched bread is an additional strength of the multicenter study.
- The intervention bread contains > 4 g beta-glucan per 30 g available carbohydrate and qualifies for an EFSA health claim on reduction of post-prandial glycaemic response.
- Due to logistics, breads had to be provided frozen, which is known to reduce bread quality and could lower consumer acceptance.

### *Keywords*

Hyperglycemia

Beta-glucan

Pre-diabetes

## Introduction

The prevalence of type 2 diabetes mellitus (T2D) has increased drastically over the last 35 years and is expected to continue to rise (1, 2). Impaired glucose tolerance (IGT) and impaired fasting glycemia (IGF) are intermediate conditions between normal glucose metabolism and T2D and are often referred to as pre-diabetes. In 2012, the International Diabetes Federation estimated the global prevalence of pre-diabetes to 280 million, which is expected to rise to 400 million by 2030 (3). Persons with pre-diabetes are at high risk of developing T2D, and it is estimated that 70% of those with pre-diabetes may develop T2D within 10 years (3, 4). Glycated hemoglobin (HbA1c) is used as a measure of glycemic control since HbA1c reflects average plasma glucose over the previous eight to twelve weeks. Common diagnostic criteria of pre-diabetes is an intermediate HbA1c of 42-47 mmol/mol (5). The causes and etiology of IGT and IGF are not fully understood, but there are strong links to obesity, age, ethnicity as well as heredity, and nutrition (6-8). Cereal grain products, especially bread, are staple foods in European diets and cereals are the main source of carbohydrate, plant protein, dietary fiber, and total energy world-wide (9). High whole grain and cereal fiber intake have consistently been associated with lower risks of T2D (10). Hence, replacing refined grains with dietary fiber-rich whole grains is regarded as a major strategy to improve public health (11). Oat- or barley-based foods are a good source of mixed-linkage beta-glucans, i.e., viscous forming dietary fiber, which have been shown to improve postprandial blood glucose. This has been endorsed through authorized health claims by the European Food Safety Authority (EFSA). However, few studies have investigated the long-term effect of breads enriched with beta-glucans on HbA1c and thereby the risk of developing T2D (12-14). The existing studies are of small sample sizes and uses a high amount of test food (8 servings per day = 320 g bread), thus not reflecting average consumption conditions. There is a need for studies to evaluate the effectiveness of the long-term intake of feasible amounts of bread enriched in beta-glucan as part of a habitual diet on diabetes risk factors particularly among individuals at elevated risk.

Therefore, we designed a multicenter intervention study in adults with a moderate to high risk of developing T2D i.e., persons with pre-diabetes to evaluate the long-term effects of regular consumption of an oat-derived beta-glucan-enriched bread, as part of a normal diet on HbA1c, in comparison to consumption of a wholegrain wheat bread. Furthermore,

1  
2  
3 exploratory analysis will be performed assessing effects on fasting blood glucose and serum  
4 lipid profile, body weight, hepatic steatosis markers, 24 h glucose profiles, gastric emptying,  
5 changes in microbiota but also consumer acceptance and attrition rates.  
6  
7  
8  
9

### 10 **Methods/design**

11  
12 The CarbHealth trial is a multi-center double-blind randomized controlled 16-week dietary  
13 intervention trial in participants with high normal HbA1c concentrations. The study is  
14 conducted at four University centers at i) University of Bergen- Bergen, Norway, ii) Chalmers  
15 University of Technology- Gothenburg, Sweden, iii) Paderborn University- Paderborn,  
16 Germany, and iv) Leipzig University- Leipzig, Germany. Intervention breads were specifically  
17 produced for the study by Nofima (Ås, Norway). This study was initiated in July 2019 and the  
18 recruitment started in July 2021. The trial is expected to be finalized by December 2022.  
19  
20  
21  
22  
23  
24  
25  
26

### 27 **Ethics and dissemination**

28  
29 The study protocol was approved by the respective ethic authorities (Swedish Ethical Review  
30 Authority, Sweden (Protocol DNR 2021-02584), Ethical committee of Paderborn University,  
31 Paderborn (approved 13 July 2021), Ethic Committee of the Medical Faculty of the University  
32 of Leipzig, Leipzig (316/21-ek), Regional Committees for Medical and Health Research Ethics,  
33 Norway (REC Nord, ref. 106931)). The study is registered in the public trial registry  
34 *Clinicaltrials.gov* (NCT04994327). The results of the study will be communicated through  
35 publication in international scientific journals and presentations at (inter)national  
36 conferences.  
37  
38  
39  
40  
41  
42  
43  
44

### 45 **Patient and public involvement**

46  
47 Participants and public were not involved in designing this study. Results will be presented  
48 to participants at the end of the trial. Participants will receive information on allocated  
49 group, HbA1c, blood lipids and body composition at the end of the trial.  
50  
51  
52  
53  
54  
55  
56  
57

### 58 **Experimental design**

59  
60 Prior to the intervention, potential participants take part in a pre-screening evaluation to



1  
2  
3 assess eligibility for inclusion, either by phone, or using an online questionnaire. If eligible, a  
4 screening visit is booked. At the subsequent screening visit, non-fasting blood samples are  
5 drawn and analyzed locally for HbA1c, liver enzymes and safety markers. Furthermore, height,  
6  
7 body weight, waist circumference, and blood pressure are measured. Participants complete  
8  
9 a medical history questionnaire including assessment of prescribed and non-prescribed  
10 medication in relation to exclusion criteria. If enrolled, clinical visits take place in weeks 0, 8  
11 and 16. During the baseline visit, the intermediate visit at 8 weeks and the final visit at 16  
12 weeks, measurements of body weight, body composition, waist circumference and blood  
13 pressure are made, fasting blood samples are drawn, and participants provide frozen fecal  
14 samples. In two centers (Gothenburg and Paderborn), continuous glucose monitoring (CGM)  
15 measurements are performed covering one week at baseline and at the end of the study.  
16 Participants are asked to maintain habitual diets and levels of physical activity during the  
17 study period. This is monitored by 6 in-study 24 h dietary recalls which are not pre-announced  
18 to the participants and by physical activity questionnaires at the study visits. An overview of  
19 the study design is presented in **Figure 1**. During the intervention period, participants are  
20 instructed to replace their usually consumed bread with the study breads. The participants  
21 are asked to consume at least 3 slices of the pre-sliced intervention bread or the pre-sliced  
22 control bread on at least 6 days per week for 16 weeks.  
23  
24  
25  
26  
27  
28  
29  
30  
31  
32  
33  
34  
35  
36  
37

38 **Figure 1.** Flowchart over the study visits in CarbHealth multicenter study.  
39  
40

### 41 **Study bread**

42 The ingredients for the breads are shown in **Table 1** and the calculated nutrient composition  
43 in **Table 2**. The two breads were matched for starch and fat content on a slice basis (**Table 2**).  
44 The daily portion of three slices of the beta-glucan enriched bread provide 286 kcal, 16.6 g  
45 dietary fiber and 6 g of beta-glucan. Three slices of the wheat bread provide 244 kcal, 5 g  
46 dietary fiber, and 0 g beta-glucan per day (**Table 2**). Both breads were developed and  
47 distributed by Nofima AS, Norway. The breads were baked at Åpent Bakeri, Oslo, Norway. The  
48 bread is provided frozen in vacuum packs of 6 slices and free of charge to the participants.  
49  
50  
51  
52  
53  
54  
55  
56  
57  
58  
59  
60

**Table 1: Ingredients for beta-glucan and control bread.**

| Ingredients               | Supplier                    | Beta-glucan bread (%) | Control bread (%) |
|---------------------------|-----------------------------|-----------------------|-------------------|
| Rapeseed oil              | Idun Industri AS, Norway    | 0.7                   | 4.7               |
| Dry yeast                 | Idun Industri AS, Norway    | 0.7                   | 0.6               |
| Salt                      | GC Rieber AS, Norway        | 1.0                   | 1.0               |
| Sieved white wheat flour  | Lantmännen Cerealia, Norway | 21.9                  | 18.7              |
| Wholegrain wheat flour    | Lantmännen Cerealia, Norway | 0                     | 37.5              |
| Water                     | Oslo kommune, Norway        | 53.8                  | 37.5              |
| SWEOAT® Bran BG14 Bakery  | Swedish Oat fiber, Sweden   | 21.9                  | 0                 |
| Coatec sorbic acid (E200) | RAPS GmbH Co. KG, Germany   | 0.05                  | 0.05              |

**Table 2: -Macronutrient composition of test breads**

| <b>Beta-glucan bread (intervention)</b> |         |                  |          |
|-----------------------------------------|---------|------------------|----------|
|                                         | g/slice | g/day (3 slices) | kcal/day |
| starch                                  | 12.2    | 36.7             | 146.7    |
| fat                                     | 2.1     | 6.3              | 56.8     |
| beta-glucan                             | 2.0     | 6.0              |          |
| protein                                 | 4.1     | 12.4             | 49.4     |
| fiber                                   | 5.5     | 16.5             | 32.9     |
| salt                                    | 0.6     | 1.8              |          |
| Moisture                                | 24.8    | 74.4             |          |
| Total                                   | 50.7    | 152.1            | 285.9    |

| <b>Whole grain Wheat bread (Control)</b> |         |                  |          |
|------------------------------------------|---------|------------------|----------|
|                                          | g/slice | g/day (3 slices) | kcal/day |
| starch                                   | 12.3    | 36.9             | 148.0    |
| fat                                      | 2.1     | 6.2              | 56.0     |
| beta-glucan                              | 0.02    | 0.06             |          |
| protein                                  | 2.5     | 7.5              | 29.9     |
| fiber                                    | 1.6     | 4.8              | 9.8      |
| salt                                     | 0.4     | 1.20             |          |
| Moisture                                 | 11.4    |                  |          |
| Total                                    | 30.4    | 91.2             | 243.7    |

### Eligibility criteria

The eligibility criteria were designed to reach people with pre-diabetes; hence, we invite men and women with BMI  $\geq 27$  kg/m<sup>2</sup>, aged 40-70 years. Additional inclusion criteria: HbA1c 35-50 mmol/mol, signed informed consent, regular bread eater and having freezer capacity for at least 2 loafs of bread. Exclusion criteria are: type 1 diabetes mellitus or pharmacologically treated type 2 diabetes mellitus, non-fasting blood glucose  $> 11.1$  mmol/l, urine glucose  $\geq 180$  mg/dl, or protein excretion as indicated by dipstick (+++, Combur 10 test strips (Roche Diagnostics)), food allergies or intolerances preventing consumption of the study breads, pregnancy, lactation or planning a pregnancy during the study period, systolic blood pressure  $\geq 160$  mmHg or diastolic blood pressure  $\geq 100$  mmHg at screening (15), history of stomach or gastrointestinal conditions (i.e. inflammatory bowel disease, Crohn's disease) history of myocardial infarction, heart failure, stroke, heart attack or cancer within 3 years prior to screening, use of anti-diabetic agents or insulin, history of alcohol abuse. Use of other medications or over-the-counter drugs or dietary supplements are allowed if the dose has been stable for a minimum of 3 months prior to the study. Any medication used will be recorded as will any changes of use. Initiation of medication to treat diabetes during the study is a reason for withdrawal.

### Recruitment

In general, participants are recruited via leaflets, press releases, newspaper ads, ads in social media and blackboard flyers. Study specific websites are developed in Bergen and Paderborn, with the possibility for online registration. If a potential participant is interested, pre-screening will be conducted over the phone or using an online questionnaire to assess eligibility, and if eligible, a screening visit is scheduled.

### Informed consent procedure

All participants screened for eligibility are provided written information about the study prior to the first study visit. At the first study visit, the participants receive additional oral information on the study and are given the opportunity to ask questions to the research personnel before signing written informed consent. The study will not carry on and no

1  
2  
3 samples will be drawn until the participant gives consent in writing. The participants have the  
4 right to withdraw their consent at any time, and to request that their biological samples and  
5 data will be destroyed.  
6  
7  
8  
9

### 10 **Randomization**

11  
12 Participants are randomized into one of the two intervention groups (1:1 allocation) using  
13 block randomization with random block lengths, stratified by sex. The web-based  
14 randomization is configured by the Biostatistics and Data Management Group of the Clinical  
15 Trials Unit at the University Medical Center Göttingen, Germany, a third party not otherwise  
16 involved in the clinical trial. To reduce performance bias, at each of the four sites, a person,  
17 who is not member of the research team, is responsible for the randomization. All other  
18 research personnel at the sites are blinded for the allocation group.  
19  
20  
21  
22  
23  
24  
25  
26

### 27 **Dietary assessment**

28  
29 The dietary assessment follows the principle of 24 h dietary recalls using country-specific food  
30 composition data. Practical conduction differs slightly between centers.  
31

32  
33 Bergen, Paderborn, and Leipzig: Dietary intakes are assessed by six 24-hour  
34 recalls (24HR) at the beginning (weeks 0-2), middle (weeks 7-9) and end of the study (weeks  
35 15-16) using the validated tool “myfood24” (<https://www.myfood24.org/>). The 24HR are  
36 performed at unannounced times to attenuate the observer effect. The German version of  
37 myfood24 is based on German Food Code and Nutrient Database  
38 (Bundeslebensmittelschlüssel (BLS) version 3.02) for generic food items and the database of  
39 the Dortmund Nutritional and Anthropometric Longitudinally Designed (DONALD) study for  
40 branded food items (16, 17). The Norwegian version is based on the Norwegian Food  
41 Composition Table for generic food items and supplemented with food composition data for  
42 missing Norwegian dishes from other sources (18).  
43  
44  
45  
46  
47  
48  
49

50  
51 Gothenburg: As Myfood24© is not available based on Swedish food  
52 composition data, dietary intake is assessed by six 24HR on study site and over phone. Three  
53 24HR are performed at site by a trained dietitian, using images of portion sizes from The  
54 Swedish Food Agency. Additionally, three 24HR are performed over phone when the  
55 participants estimate portion sizes using a standard kitchen measure (e.g., dl measure and  
56 slices). To determine the nutritional composition of the intake, the DietistNet Pro software  
57  
58  
59  
60

1  
2  
3 (Kost och Näringsdata AB, Bromma, Sweden) is used which is based on Swedish Food  
4 Composition Database.  
5  
6  
7

### 8 **Clinical assessments**

9  
10 Visits include collection of blood and urine samples, assessment of blood pressure, and  
11 anthropometric data including waist circumference, body weight and height, as well as body  
12 composition (described under “anthropometric measurements”). Participants are instructed  
13 to not eat or drink (except maximum 0.5L of non-carbonated water) 10 hours prior to the  
14 visits. Additionally, participants are instructed to avoid alcohol consumption, smoking and  
15 use of other tobacco products, and vigorous physical activity 12 h prior to the clinical visit.  
16  
17  
18  
19  
20  
21  
22

### 23 **Consumer acceptance**

24  
25 Participants evaluate the bread on day 1 and on week 8 of the study. The questionnaire  
26 is adapted from a previously established method (19). Participants rate their hunger,  
27 acceptability, and expected satiation in a 9-point scale. The participants rate expected  
28 satiety on a 6-point scale. Participants describe the bread via a check-all-that-apply (CATA)  
29 question (19, 20), “Choose all the attributes/terms that you think apply to this bread”, using  
30 28 hedonic and descriptive attributes and 16 usage & attitude attributes. Terms are  
31 randomized within groups and across participants. They answer two consumption  
32 questions:” In which meals do you consume bread?” and” How many bread slices do you eat  
33 on a typical day”.  
34  
35  
36  
37  
38  
39  
40

41 Data for Norway and Sweden were collected through online forms in EyeQuestion  
42 (Logic8 BV, The Netherlands) and stored in a secure server owned by Nofima. Participants  
43 from Germany filled in the questionnaire on paper.  
44  
45  
46  
47  
48

### 49 **Blood collection and analysis**

50  
51 During study visits, fasting blood samples are taken from an antecubital vein and placed in  
52 tubes containing either a clot activator or lithium heparin (Becton-Dickinson, Eysins,  
53 Switzerland) to obtain serum or plasma. Serum tubes are stored at room temperature for 30  
54 minutes and then centrifuged at 1300g at 4°C for 10 minutes. Plasma tubes are immediately  
55 centrifuged except for one tube for HbA1c measurements. EDTA-plasma, serum and Li-  
56 Heparin plasma are immediately refrigerated/kept on ice, processed, and aliquoted into  
57  
58  
59  
60

1  
2  
3 microtubes. Whole blood, plasma and serum aliquots are frozen at -20°C within 2 h of  
4 sample collection and transferred into -80°C within 24h. Blood samples are sent on dry ice  
5 to the Department of Medical Biochemistry and Pharmacology at Haukeland University  
6 Hospital, Bergen, every 6 weeks for analyses of HbA1c and secondary outcomes.  
7  
8  
9

### 10 11 12 **Analytical methods**

13  
14 Blood glucose is measured by a validated, portable system at room temperature (HemoCue®  
15 Glucose 201 RT system (HemoCue AB, Ängelholm, Sweden) at all centers. All other blood or  
16 serum measurements will be done at Haukeland University Hospital, Bergen (certified  
17 laboratory NSEN-ISO 15189), in frozen samples stored at -80 °C. HbA1c is measured in EDTA  
18 whole blood samples which have been stored at maximum for 8 weeks by HPLC (BioRad,  
19 Hercules, CA). Liver enzymes and plasma lipids are measured using standard methods on a  
20 Cobas c702 autoanalyzer. Liver enzymes are measured photometrically according to the IFCC  
21 method (Roche Diagnostics, Mannheim, Germany). Serum triacylglycerides and total  
22 cholesterol are measured with an enzymatic colorimetric method. LDL cholesterol is  
23 measured photometrically, and HDL cholesterol is measured by a homogeneous enzymatic  
24 colorimetric method.  
25  
26  
27  
28  
29  
30  
31  
32  
33

### 34 35 36 **Dietary compliance**

37  
38 Compliance is assessed based on the evaluation of the 24HR and a pre-coded compliance  
39 journal kept by the participant during the study. Participants are instructed to tick off the  
40 number of slices consumed on each day. Compliance is a secondary outcome and sensitivity  
41 analysis will be performed based on compliance journals and 24HR.  
42  
43  
44  
45

### 46 47 48 **Anthropometric assessments**

49  
50 Body weight is measured during all study visits including screening, with the participants  
51 wearing light clothing (e.g., underwear and t-shirt) and no shoes. Body weight is noted to the  
52 nearest 0.1 kg in the case report form (CRF). Height is measured using a Seca Stadiometer,  
53 model 217 or using the mBCA 515 integrated stadiometer. Height is measured once at  
54 screening without shoes to the nearest 0.1 cm. Waist circumference is measured twice on  
55 each occasion with a Seca 201 cm tape measurer to the nearest 0.1 cm according to WHO  
56 standards. The average of the two measurements are used for data analysis. Body  
57  
58  
59  
60

1  
2  
3 composition (whole body mass, fat mass and lean body mass) is measured at all study visits  
4 by Bio-electrical Impedance Analysis using Seca mBCA 515 (in Bergen, Paderborn, and  
5 Leipzig). The measurements are performed in the morning after a 12 hour fast and in  
6 accordance with a standardized protocol.  
7  
8  
9

10           Gothenburg: Body composition is measured using a Dual Energy X-ray  
11 absorptiometry, DEXA (iDXA, GE Medical Systems, Madison, WI, USA) using the software Core  
12 version 18.0. The DEXA-scan is conducted in the morning after an overnight fast with the  
13 participants wearing light clothing.  
14  
15  
16  
17  
18  
19

### 20 **Twenty-four-hour continuous glucose monitoring**

21 A continuous glucose monitoring device (CGM) is used (Gothenburg and Paderborn) to obtain  
22 24-h continuous interstitial glucose concentration data on two occasions for 7 days each  
23 between baseline and week 1 and between week 15 and week 16. CGM data is used to  
24 calculate 24-h interstitial glucose peak, mean, coefficient of variation (CV) and total area  
25 under the curve (AUC). In addition, glucose response to bread consumption is evaluated  
26 separately for morning and evening meals.  
27  
28  
29  
30  
31  
32  
33

34 The devices differ between centers and the specific devices are described below.

35           In Paderborn: A Dexcom G6 CGM (DexCom Inc., San Diego, US) is used. The glucose  
36 oxidase sensor is inserted into the upper part of the non-dominant arm or the abdominal area  
37 at least 5 cm away from the umbilicus to obtain an interstitial glucose measurement. Self-  
38 monitoring glucose readings (finger sticks) are performed with a blood sugar monitoring  
39 device (CONTOUR®NEXT ONE, Ascencia Diabetes Care, US) twice per day (morning and  
40 evening). The sensor does not need to be calibrated.  
41  
42  
43  
44  
45  
46

47           In Gothenburg: An Abbott FreeStyle Libre Pro iQ CGM (Chicago, Illinois, US) is used. The  
48 glucose oxidase sensor is inserted into the back of the upper part of the non-dominant arm.  
49 Participants can wear the sensor for up to 14 days and it does not need to be calibrated.  
50  
51  
52  
53

### 54 **Fecal samples**

55 Spot fecal samples are collected at baseline, week 8 and 16. Collection is voluntary, and non-  
56 delivery of fecal samples is not a reason for exclusion. The samples will be collected in specific  
57 devices (Easy Sampler Collection Kit, GP Medical Devices ApS, Denmark). The participants are  
58  
59  
60

1  
2  
3 instructed to collect the fecal sample within 72 h of the clinical visit and are instructed to keep  
4 the sample in a household freezer until delivery to the study center. The participants are  
5 instructed to keep the sample in a freezer bag with cooling blocks during transportation to  
6 the study center. At the study center the samples are transferred to -80°C within 24 h.  
7 Samples are analyzed for the composition of the gut microbiota to provide possible  
8 mechanistic explanations underlying differential responses of participants of selected  
9 outcomes. All fecal microbiota analysis will be performed at Chalmers University of  
10 Technology (Gothenburg, Sweden).  
11  
12  
13  
14  
15  
16  
17  
18  
19

## 20 **2.10 Questionnaires**

21 Participants complete several questionnaires during the study period. All questionnaires  
22 have been validated and are available in respective languages:  
23  
24

25 For physical activity assessment, participants complete the International  
26 Physical Activity Questionnaire (IPAQ) at baseline, week 8 and 16. The IPAQ is used to  
27 estimate daily inactivity and physical activity and has been shown to have adequate validity  
28 and reliability in various nationalities (21).  
29  
30  
31

32 For chronotype, the Munich Chronotype Questionnaire (MCTQ) is  
33 administered at baseline, week 8 and 16 to estimate chronotype and sleep behavior during  
34 the trial. Chronotype is defined as the midpoint of sleep on free days corrected for sleep  
35 debt on workdays (MSFsc). Chronotype is also verified by use of an accelerometer in week 1  
36 and 16 (Paderborn) (22).  
37  
38  
39  
40

41 For subjective health and well-being assessment, the 12-item Short Form  
42 Health Survey (RAND SF-12) is used at baseline, week 8 and 16. The questionnaire is used to  
43 evaluate perceived physical and emotional well-being.  
44  
45  
46

47 For alcohol abuse, the four-question validated CAGE (Cut down, Annoyed,  
48 Guilty and Eye opener) questionnaire will be administered at screening visit to assess the  
49 risk of alcohol abuse.  
50  
51  
52

## 53 **2.14. Study outcomes**

54 The primary outcome is the difference in glycemic control measured by HbA1c after 16  
55 weeks between the intervention and control group. The trial has defined a number of  
56 exploratory secondary outcomes : I) difference in fasting capillary blood glucose after 16  
57  
58  
59  
60



1  
2  
3 weeks, II) difference in fat mass (kg) and lean body mass (kg), III) difference in blood lipids  
4 (LDL-C, HDL-C, triglycerides), IV) difference in fatty liver index (based on serum liver enzyme  
5 activities (ALAT, ASAT)), changes in fecal microbiota composition, V) consumer acceptance  
6 at baseline and 8 weeks, VI) difference in postprandial response to morning and evening  
7 meals with the two breads based on CGM-data (Paderborn and Gothenburg only), VII) if the  
8 individual chronotype of a person influences bread consumption and metabolic health, VIII)  
9 analysis of plasma and fecal metabolome and short chain fatty acids in fecal and blood  
10 samples, and IX) sensitivity analysis of compliance to the protocol measured with 24 h  
11 recalls and compliance journal.  
12  
13  
14  
15  
16  
17  
18  
19  
20  
21

### 2.15. Data analysis and sample size estimates

22 Intention-to-treat analysis will be performed following a statistical analysis plan that was set  
23 up a priori.  
24

25 The primary outcome is the difference in HbA1c between the intervention and the control  
26 group at the end of the study, and the main analysis will include intervention group, study  
27 center, and baseline HbA1c as independent variables in a linear regression model. The results  
28 will be presented as the mean difference (95% confidence intervals), with corresponding p-  
29 values. Missing data will be handled with flexible imputation of missing data. The main  
30 analysis will be accompanied by complete case analysis. A best-worst and worst-best  
31 sensitivity analyses will be performed to evaluate the theoretical range of uncertainty due to  
32 missing outcome data (23). The best-worst-case scenario will be constructed by assuming all  
33 dropouts in the intervention group to have an HbA1c at 16 weeks of the study center specific  
34 intervention group mean -2SD, and all dropouts in the control group to have an Hba1c of  
35 control group mean +2SD, and vice versa. The same analysis plan will apply to secondary  
36 outcome variables. Exploratory post-hoc analysis will include stratified analyses by sex, by  
37 BMI (27-30, >30 kg/m<sup>2</sup>), by chronotype (based on MCTQ), and by center to explore potential  
38 country- and center-specific differences.  
39  
40  
41  
42  
43  
44  
45  
46  
47  
48  
49  
50  
51  
52  
53

54 The statistical power calculation is based on the difference in HbA1c between the two groups  
55 (intervention and control) at the end of the study, as the estimated effect. We expect the  
56 starting HbA1c concentration to be approximately 41 mmol/mol with a standard deviation of  
57 6 mmol/mol and expect a reduction to 38 mmol/mol in the intervention group with small  
58  
59  
60

1  
2  
3 changes in the control group. Power calculation is based on this between-group difference in  
4 the HbA1c concentrations, with a standard deviation of 6 mmol/mol (assuming similar  
5 standard deviations in both groups) and at a power of 90% and at a significance level of 0.05.  
6  
7 To allow for 45% dropouts and ensure the conditions met, the aim was to recruit 250  
8 participants into the entire multicenter study: 125 in each treatment group. Assumptions and  
9 estimates for the power-calculation were taken from dietary intervention studies (14, 24) and  
10 the calculation was using the R software package (power t-test). The effect size was chosen  
11 to be moderate as this is a single-food intervention study.  
12  
13  
14  
15  
16  
17  
18  
19  
20  
21

## 22 **2. Discussion**

23 The CarbHealth trial aims to evaluate effectiveness of a beta-glucan-enriched bread i.e.,  
24 whether habitual consumption of a bread containing beta-glucan (>4 g beta-glucan per 30 g  
25 available carbohydrate) vs a control wheat bread with 66% whole grain wheat under everyday  
26 conditions will affect long term glycemic control among persons at risk for T2D over a period  
27 of 16 weeks.  
28  
29  
30  
31  
32

33  
34 The CarbHealth trial is a pragmatic trial investigating food typically consumed. Participants  
35 replace their habitual bread with study bread, instead of adding or removing food items.  
36 Studies have shown that people are conservative regarding dietary changes (25), thus  
37 swapping a healthier alternative for a habitually consumed foods may be easier than changing  
38 food habits. A bread with 66% wholegrain wheat was chosen as the control bread instead of  
39 refined wheat bread to reflect dietary habits in Northern European countries. Since the  
40 quality of bread and the associated metabolic effects varies substantially (26) use of a medium  
41 to low glycemic index-bread rich in beta-glucan may substantially benefit metabolic health.  
42 Whilst complex interventions have been found to substantially reduce progression to  
43 diabetes among persons with pre-diabetes (27), many patients may not be prepared for such  
44 complex changes; thus exchange of bread with a healthier alternative may be more feasible.  
45  
46  
47  
48  
49  
50  
51  
52  
53  
54

55  
56 Nutrition studies often lack statistical power hampering firm conclusions (28, 29). Multicenter  
57 studies may offer a strategy to overcome this shortcoming. Recruitment of the required 250  
58 participants would be difficult for one study center alone. Central production and distribution  
59  
60

1  
2  
3 of the study breads by a third research partner (Nofima) enables this approach. Furthermore,  
4 the multicenter design employed in CarbHealth allows to study the metabolic effects and the  
5 effectiveness of bread against the background of different bread consumption patterns in the  
6 participating countries and to analyze differences in general dietary practices and potential  
7 acceptability. The multicenter study also takes advantage of the expertise of different groups,  
8 thus adding microbiota research, chronotype and continuous glucose measurements as well  
9 as consumer acceptance to the study outcomes. Furthermore, collaboration with food  
10 technologists that were able to produce a beta-glucan enriched bread is an additional  
11 strength of the multicenter study. Additional strengths of the CarbHealth-study include  
12 strong design features such as randomization, double-blinding, and provision of bread. One  
13 limitation of the study is that, due to logistics, breads had to be provided frozen, which is  
14 known to reduce bread quality and could lower consumer acceptance which could result in a  
15 lower compliance.  
16  
17  
18  
19  
20  
21  
22  
23  
24  
25  
26  
27  
28

29 There may be important implications from this research regardless of the findings. If a  
30 beneficial effect was supported by evidence of a positive effect on long term blood glucose  
31 levels among persons with pre-diabetes, public health efforts should be taken to make beta-  
32 glucan-enriched bread available in European countries. This should be accompanied by efforts  
33 to increase the awareness, particularly among persons at risk of T2D, of a simple and effective  
34 replacement. Conversely, if a beneficial effect was not supported this could suggest that the  
35 bread is either not sufficiently enriched with beta-glucans, the beta-glucan has sub-optimal  
36 physiological characteristics e.g. solubility, pre-frozen bread may not be the optimal matrix  
37 for beta-glucan or that the reduction in post-prandial glycemic response achieved with a  
38 similar beta-glucan-enriched bread (30) does not translate into strong long term benefits for  
39 blood glucose control compared to a wholegrain wheat bread under every-day conditions.  
40 Notwithstanding, exploratory sub-group analyses will allow insights into factors determining  
41 responsiveness (e.g., compliance, meal context, consumer acceptance in different  
42 countries/center, sex). Similarly, secondary analyses will inform whether any potential effect  
43 or lack of effectiveness extends to other metabolic parameters.  
44  
45  
46  
47  
48  
49  
50  
51  
52  
53  
54  
55  
56  
57

58 Hence, the results of the CarbHealth study will provide important information on the public  
59 health relevance of a beta-glucan-enriched bread for reduction of post-prandial glycemic  
60

1  
2  
3 response in persons with pre-diabetes.  
4  
5

6 **Ethics statements**

7  
8 **Patient consent for publication**

9  
10 Not applicable.  
11  
12

13  
14 **Declaration of competing interest**

15 All authors state no competing interests.  
16

17 **Funding**

18  
19 This project has received funding from the Research Council of Norway, Formas Research  
20 Council of Sweden, the Federal Ministry of Education and Research (Germany) under the  
21 umbrella of the European Joint Programming Initiative “A Healthy Diet for a Healthy Life”  
22 (JPI HDHL) and of the ERA-NET Cofund HDHL INTIMIC (GA N° 727565 of the EU Horizon 2020  
23 Research and Innovation Programme (grant number N/A). The funding agencies did not play  
24 any part in designing the clinical trial.  
25  
26  
27  
28  
29

30 **Contributors**

31  
32 TH wrote the first the first draft of the manuscript. JD is the chief investigator of this trial. JD  
33 along with RL, AB, AK, and SB: research question, study design, acquisition of data, obtaining  
34 the funding, implementation of the study protocol, critical revision, and final approval of the  
35 manuscript. TH, HRR, IR, LT, AS, US, KM, KP, AR, VL, PV: feedback of study design,  
36 implementation of study protocol, acquisition of data, critical revision, and final approval of  
37 the manuscript.  
38  
39  
40  
41  
42  
43  
44  
45  
46  
47  
48  
49  
50  
51  
52  
53  
54  
55  
56  
57  
58  
59  
60

## References

1. Leon BM, Maddox TM. Diabetes and cardiovascular disease: Epidemiology, biological mechanisms, treatment recommendations and future research. *World J Diabetes*. 2015;6(13):1246-58.
2. Saeedi P, Petersohn I, Salpea P, Malanda B, Karuranga S, Unwin N, et al. Global and regional diabetes prevalence estimates for 2019 and projections for 2030 and 2045: Results from the International Diabetes Federation Diabetes Atlas, 9th edition. *Diabetes Research and Clinical Practice*. 2019;157:107843.
3. Perreault L, Færch K. Approaching Pre-diabetes. *Journal of Diabetes and its Complications*. 2014;28(2):226-33.
4. World Health Organization WHO. Diabetes 2020 [updated June 8 2020; cited 2020 Sept 28]. Available from: <https://www.who.int/news-room/fact-sheets/detail/diabetes>.
5. International Expert Committee Report on the Role of the A1C Assay in the Diagnosis of Diabetes. *Diabetes Care*. 2009;32(7):1327.
6. International Diabetes Federation IDF. IDF DIABETES ATLAS, 2017. Eighth edition ed2017.
7. Wang YC, McPherson K, Marsh T, Gortmaker SL, Brown M. Health and economic burden of the projected obesity trends in the USA and the UK. *The Lancet*. 2011;378(9793):815-25.
8. Ley SH, Hamdy O, Mohan V, Hu FB. Prevention and management of type 2 diabetes: dietary components and nutritional strategies. *Lancet*. 2014;383(9933):1999-2007.
9. Poutanen KS, Kårlund AO, Gómez-Gallego C, Johansson DP, Scheers NM, Marklinder IM, et al. Grains - a major source of sustainable protein for health. *Nutr Rev*. 2021.
10. Reynolds A, Mann J, Cummings J, Winter N, Mete E, Te Morenga L. Carbohydrate quality and human health: a series of systematic reviews and meta-analyses. *The Lancet*. 2019;393(10170):434-45.
11. Ludwig DS, Hu FB, Tappy L, Brand-Miller J. Dietary carbohydrates: role of quality and quantity in chronic disease. *BMJ*. 2018;361:k2340.
12. Pick ME, Hawrysh ZJ, Gee MI, Toth E. Barley Bread products improve glycemic

- control of Type 2 subjects. *International Journal of Food Sciences and Nutrition*. 1998;49(1):71-8.
13. Östman EM, Frid AH, Groop LC, Björck IME. A dietary exchange of common bread for tailored bread of low glycaemic index and rich in dietary fibre improved insulin economy in young women with impaired glucose tolerance. *European Journal of Clinical Nutrition*. 2006;60(3):334-41.
  14. Tessari P, Lante A. A Multifunctional Bread Rich in Beta Glucans and Low in Starch Improves Metabolic Control in Type 2 Diabetes: A Controlled Trial. *Nutrients*. 2017;9(3).
  15. Williams B, Mancia G, Spiering W, Agabiti Rosei E, Azizi M, Burnier M, et al. 2018 ESC/ESH Guidelines for the management of arterial hypertension: The Task Force for the management of arterial hypertension of the European Society of Cardiology (ESC) and the European Society of Hypertension (ESH). *European Heart Journal*. 2018;39(33):3021-104.
  16. Koch SAJ, Conrad J, Cade JE, Weinhold L, Alexy U, Nöthlings U. Validation of the web-based self-administered 24-h dietary recall myfood24-Germany: comparison with a weighed dietary record and biomarkers. *European Journal of Nutrition*. 2021;60(7):4069-82.
  17. Koch SAJ, Conrad J, Hierath L, Hancock N, Beer S, Cade JE, et al. Adaptation and Evaluation of Myfood24-Germany: A Web-Based Self-Administered 24-h Dietary Recall for the German Adult Population. *Nutrients*. 2020;12(1).
  18. Salvesen L, Engeset D, Øverby NC, Medin AC. Development and evaluation of image-series for portion size estimation in dietary assessment among adults. *Journal of Nutritional Science*. 2021;10:e3.
  19. Nguyen QC, Wahlgren MB, Almlí VL, Varela P. Understanding the role of dynamic texture perception in consumers' expectations of satiety and satiation. A case study on barley bread. *Food Quality and Preference*. 2017;62:218-26.
  20. Varela P, Ares G. Sensory profiling, the blurred line between sensory and consumer science. A review of novel methods for product characterization. *Food Research International*. 2012;48(2):893-908.
  21. Craig CL, Marshall AL, Sjöström M, Bauman AE, Booth ML, Ainsworth BE, et al. International physical activity questionnaire: 12-country reliability and validity. *Medicine & science in sports & exercise*. 2003;35(8):1381-95.
  22. Roenneberg T, Wirz-Justice A, Merrow M. Life between clocks: daily temporal patterns of human chronotypes. *Journal of biological rhythms*. 2003;18(1):80-90.
  23. Jakobsen JC, Gluud C, Wetterslev J, Winkel P. When and how should multiple imputation be used for handling missing data in randomised clinical trials – a practical guide with flowcharts. *BMC Medical Research Methodology*. 2017;17(1):162.
  24. Cole RE, Boyer KM, Spanbauer SM, Sprague D, Bingham M. Effectiveness of Prediabetes Nutrition Shared Medical Appointments: Prevention of Diabetes. *The Diabetes Educator*. 2013;39(3):344-53.
  25. Shepherd R. Resistance to changes in diet. *Proceedings of the nutrition society*. 2002;61(2):267-72.
  26. Goletzke J, Atkinson FS, Ek KL, Bell K, Brand-Miller JC, Buyken AE. Glycaemic and insulin index of four common German breads. *Eur J Clin Nutr*. 2016;70(7):808-11.
  27. Tuomilehto J, Lindström J, Eriksson JG, Valle TT, Hämäläinen H, Ilanne-Parikka P, et al. Prevention of type 2 diabetes mellitus by changes in lifestyle among subjects with impaired glucose tolerance. *New England Journal of Medicine*. 2001;344(18):1343-50.

- 1  
2  
3 28. Kroeger CM, Garza C, Lynch CJ, Myers E, Rowe S, Schneeman BO, et al.  
4 Scientific rigor and credibility in the nutrition research landscape. *The American Journal of*  
5 *Clinical Nutrition*. 2018;107(3):484-94.  
6  
7 29. Vorland CJ, Brown AW, Dawson JA, Dickinson SL, Golzarri-Arroyo L, Hannon BA,  
8 et al. Errors in the implementation, analysis, and reporting of randomization within obesity  
9 and nutrition research: a guide to their avoidance. *International Journal of Obesity*.  
10 2021;45(11):2335-46.  
11  
12 30. Rieder A, Knutsen SH, Sainz Fernandez A, Ballance S. At a high dose even  
13 partially degraded beta-glucan with decreased solubility significantly reduced the glycaemic  
14 response to bread. *Food & Function*. 2019;10(3):1529-39.  
15  
16  
17

### 18 **Figure Legend**

19  
20 **Figure 1.** Flowchart over the study visits in CarbHealth multicenter study.  
21  
22  
23  
24  
25  
26  
27  
28  
29  
30  
31  
32  
33  
34  
35  
36  
37  
38  
39  
40  
41  
42  
43  
44  
45  
46  
47  
48  
49  
50  
51  
52  
53  
54  
55  
56  
57  
58  
59  
60

For peer review only

1  
2  
3  
4  
5  
6  
7  
8  
9  
10  
11  
12  
13  
14  
15  
16  
17  
18  
19  
20  
21  
22  
23  
24  
25  
26  
27  
28  
29  
30  
31  
32  
33  
34  
35  
36  
37  
38  
39  
40  
41  
42  
43  
44  
45  
46  
47  
48  
49  
50  
51  
52  
53  
54  
55  
56  
57  
58  
59  
60

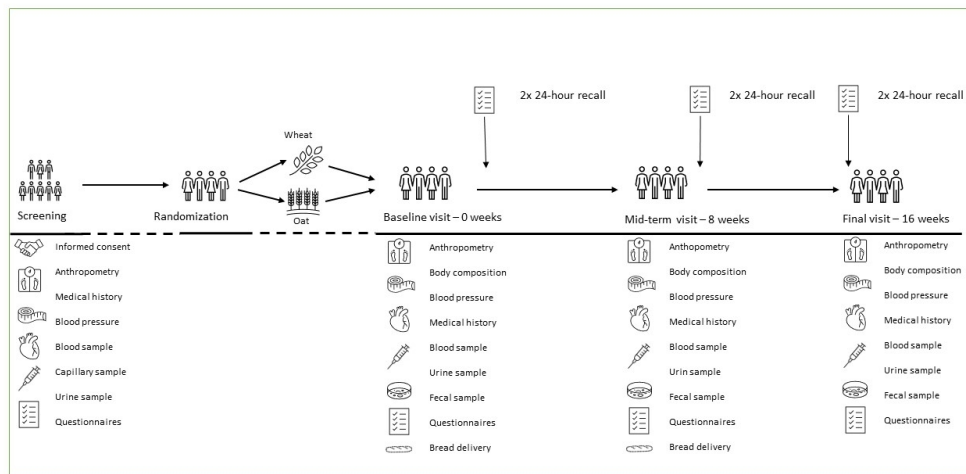

Figure 1. Flowchart over the study visits in CarbHealth multicenter study.

338x190mm (96 x 96 DPI)



# Reporting checklist for protocol of a clinical trial.

Based on the SPIRIT guidelines.

## Instructions to authors

Complete this checklist by entering the page numbers from your manuscript where readers will find each of the items listed below.

Your article may not currently address all the items on the checklist. Please modify your text to include the missing information. If you are certain that an item does not apply, please write "n/a" and provide a short explanation.

Upload your completed checklist as an extra file when you submit to a journal.

In your methods section, say that you used the SPIRIT reporting guidelines, and cite them as:

Chan A-W, Tetzlaff JM, Gøtzsche PC, Altman DG, Mann H, Berlin J, Dickersin K, Hróbjartsson A, Schulz KF, Parulekar WR, Krleža-Jerić K, Laupacis A, Moher D. SPIRIT 2013 Explanation and Elaboration: Guidance for protocols of clinical trials. *BMJ*. 2013;346:e7586

|                                   |                                                                                                                                 | Page   |
|-----------------------------------|---------------------------------------------------------------------------------------------------------------------------------|--------|
|                                   | Reporting Item                                                                                                                  | Number |
| <b>Administrative information</b> |                                                                                                                                 |        |
| Title                             | <a href="#">#1</a> Descriptive title identifying the study design, population, interventions, and, if applicable, trial acronym | 1      |

|                                                                                  |                                                                  |                     |                                                                                                                                                                                                                                                                                          |               |
|----------------------------------------------------------------------------------|------------------------------------------------------------------|---------------------|------------------------------------------------------------------------------------------------------------------------------------------------------------------------------------------------------------------------------------------------------------------------------------------|---------------|
| 1<br>2<br>3<br>4<br>5<br>6                                                       | Trial registration                                               | <a href="#">#2a</a> | Trial identifier and registry name. If not yet registered, name of intended registry                                                                                                                                                                                                     | 6             |
| 7<br>8<br>9<br>10<br>11                                                          | Trial registration:<br>data set                                  | <a href="#">#2b</a> | All items from the World Health Organization Trial Registration Data Set                                                                                                                                                                                                                 | N/A           |
| 12<br>13<br>14                                                                   | Protocol version                                                 | <a href="#">#3</a>  | Date and version identifier                                                                                                                                                                                                                                                              | N/A           |
| 15<br>16<br>17<br>18<br>19                                                       | Funding                                                          | <a href="#">#4</a>  | Sources and types of financial, material, and other support                                                                                                                                                                                                                              | 17            |
| 20<br>21<br>22<br>23<br>24<br>25<br>26<br>27                                     | Roles and<br>responsibilities:<br>contributorship                | <a href="#">#5a</a> | Names, affiliations, and roles of protocol contributors                                                                                                                                                                                                                                  | 1 , 17-<br>18 |
| 28<br>29<br>30<br>31<br>32<br>33<br>34<br>35<br>36<br>37                         | Roles and<br>responsibilities:<br>sponsor contact<br>information | <a href="#">#5b</a> | Name and contact information for the trial sponsor                                                                                                                                                                                                                                       | N/A           |
| 38<br>39<br>40<br>41<br>42<br>43<br>44<br>45<br>46<br>47<br>48<br>49<br>50<br>51 | Roles and<br>responsibilities:<br>sponsor and funder             | <a href="#">#5c</a> | Role of study sponsor and funders, if any, in study design; collection, management, analysis, and interpretation of data; writing of the report; and the decision to submit the report for publication, including whether they will have ultimate authority over any of these activities | 17            |
| 52<br>53<br>54<br>55<br>56<br>57<br>58<br>59<br>60                               | Roles and<br>responsibilities:<br>committees                     | <a href="#">#5d</a> | Composition, roles, and responsibilities of the coordinating centre, steering committee, endpoint adjudication committee, data management team, and                                                                                                                                      | N/A           |

1 other individuals or groups overseeing the trial, if  
 2  
 3 applicable (see Item 21a for data monitoring committee)  
 4  
 5

## 6 Introduction

7  
 8  
 9 Background and [#6a](#) Description of research question and justification for 5  
 10  
 11 rationale undertaking the trial, including summary of relevant  
 12  
 13 studies (published and unpublished) examining benefits  
 14

15 and harms for each intervention  
 16  
 17

18  
 19 Background and [#6b](#) Explanation for choice of comparators 5  
 20  
 21 rationale: choice of  
 22  
 23 comparators  
 24  
 25

26 Objectives [#7](#) Specific objectives or hypotheses 5-6  
 27  
 28

29 Trial design [#8](#) Description of trial design including type of trial (eg, 6  
 30  
 31 parallel group, crossover, factorial, single group),  
 32  
 33 allocation ratio, and framework (eg, superiority,  
 34  
 35 equivalence, non-inferiority, exploratory)  
 36  
 37  
 38

## 39 Methods:

40  
 41 Participants,  
 42  
 43 interventions, and  
 44  
 45 outcomes  
 46  
 47  
 48

49 Study setting [#9](#) Description of study settings (eg, community clinic, 6  
 50  
 51 academic hospital) and list of countries where data will be  
 52  
 53 collected. Reference to where list of study sites can be  
 54  
 55 obtained  
 56  
 57  
 58  
 59  
 60

|    |                      |                      |                                                              |     |
|----|----------------------|----------------------|--------------------------------------------------------------|-----|
| 1  | Eligibility criteria | <a href="#">#10</a>  | Inclusion and exclusion criteria for participants. If        | 8   |
| 2  |                      |                      |                                                              |     |
| 3  |                      |                      | applicable, eligibility criteria for study centres and       |     |
| 4  |                      |                      | individuals who will perform the interventions (eg,          |     |
| 5  |                      |                      | surgeons, psychotherapists)                                  |     |
| 6  |                      |                      |                                                              |     |
| 7  |                      |                      |                                                              |     |
| 8  |                      |                      |                                                              |     |
| 9  |                      |                      |                                                              |     |
| 10 |                      |                      |                                                              |     |
| 11 | Interventions:       | <a href="#">#11a</a> | Interventions for each group with sufficient detail to allow | 6-7 |
| 12 |                      |                      |                                                              |     |
| 13 | description          |                      | replication, including how and when they will be             |     |
| 14 |                      |                      |                                                              |     |
| 15 |                      |                      | administered                                                 |     |
| 16 |                      |                      |                                                              |     |
| 17 |                      |                      |                                                              |     |
| 18 |                      |                      |                                                              |     |
| 19 | Interventions:       | <a href="#">#11b</a> | Criteria for discontinuing or modifying allocated            | 7   |
| 20 |                      |                      |                                                              |     |
| 21 | modifications        |                      | interventions for a given trial participant (eg, drug dose   |     |
| 22 |                      |                      | change in response to harms, participant request, or         |     |
| 23 |                      |                      | improving / worsening disease)                               |     |
| 24 |                      |                      |                                                              |     |
| 25 |                      |                      |                                                              |     |
| 26 |                      |                      |                                                              |     |
| 27 |                      |                      |                                                              |     |
| 28 |                      |                      |                                                              |     |
| 29 | Interventions:       | <a href="#">#11c</a> | Strategies to improve adherence to intervention protocols,   | N/A |
| 30 |                      |                      |                                                              |     |
| 31 | adherence            |                      | and any procedures for monitoring adherence (eg, drug        |     |
| 32 |                      |                      | tablet return; laboratory tests)                             |     |
| 33 |                      |                      |                                                              |     |
| 34 |                      |                      |                                                              |     |
| 35 |                      |                      |                                                              |     |
| 36 | Interventions:       | <a href="#">#11d</a> | Relevant concomitant care and interventions that are         | 6-7 |
| 37 |                      |                      |                                                              |     |
| 38 | concomitant care     |                      | permitted or prohibited during the trial                     |     |
| 39 |                      |                      |                                                              |     |
| 40 |                      |                      |                                                              |     |
| 41 |                      |                      |                                                              |     |
| 42 | Outcomes             | <a href="#">#12</a>  | Primary, secondary, and other outcomes, including the        | 14  |
| 43 |                      |                      |                                                              |     |
| 44 |                      |                      | specific measurement variable (eg, systolic blood            |     |
| 45 |                      |                      | pressure), analysis metric (eg, change from baseline, final  |     |
| 46 |                      |                      | value, time to event), method of aggregation (eg, median,    |     |
| 47 |                      |                      | proportion), and time point for each outcome. Explanation    |     |
| 48 |                      |                      | of the clinical relevance of chosen efficacy and harm        |     |
| 49 |                      |                      | outcomes is strongly recommended                             |     |
| 50 |                      |                      |                                                              |     |
| 51 |                      |                      |                                                              |     |
| 52 |                      |                      |                                                              |     |
| 53 |                      |                      |                                                              |     |
| 54 |                      |                      |                                                              |     |
| 55 |                      |                      |                                                              |     |
| 56 |                      |                      |                                                              |     |
| 57 |                      |                      |                                                              |     |
| 58 |                      |                      |                                                              |     |
| 59 |                      |                      |                                                              |     |
| 60 |                      |                      |                                                              |     |

|    |                           |                      |                                                            |     |
|----|---------------------------|----------------------|------------------------------------------------------------|-----|
| 1  | Participant timeline      | <a href="#">#13</a>  | Time schedule of enrolment, interventions (including any   | 6-7 |
| 2  |                           |                      | run-ins and washouts), assessments, and visits for         |     |
| 3  |                           |                      | participants. A schematic diagram is highly recommended    |     |
| 4  |                           |                      | (see Figure)                                               |     |
| 5  |                           |                      |                                                            |     |
| 6  |                           |                      |                                                            |     |
| 7  |                           |                      |                                                            |     |
| 8  |                           |                      |                                                            |     |
| 9  |                           |                      |                                                            |     |
| 10 |                           |                      |                                                            |     |
| 11 | Sample size               | <a href="#">#14</a>  | Estimated number of participants needed to achieve         | 15  |
| 12 |                           |                      | study objectives and how it was determined, including      |     |
| 13 |                           |                      | clinical and statistical assumptions supporting any sample |     |
| 14 |                           |                      | size calculations                                          |     |
| 15 |                           |                      |                                                            |     |
| 16 |                           |                      |                                                            |     |
| 17 |                           |                      |                                                            |     |
| 18 |                           |                      |                                                            |     |
| 19 |                           |                      |                                                            |     |
| 20 |                           |                      |                                                            |     |
| 21 | Recruitment               | <a href="#">#15</a>  | Strategies for achieving adequate participant enrolment to | 9   |
| 22 |                           |                      | reach target sample size                                   |     |
| 23 |                           |                      |                                                            |     |
| 24 |                           |                      |                                                            |     |
| 25 |                           |                      |                                                            |     |
| 26 | <b>Methods:</b>           |                      |                                                            |     |
| 27 |                           |                      |                                                            |     |
| 28 | <b>Assignment of</b>      |                      |                                                            |     |
| 29 | <b>interventions (for</b> |                      |                                                            |     |
| 30 | <b>controlled trials)</b> |                      |                                                            |     |
| 31 |                           |                      |                                                            |     |
| 32 |                           |                      |                                                            |     |
| 33 |                           |                      |                                                            |     |
| 34 |                           |                      |                                                            |     |
| 35 |                           |                      |                                                            |     |
| 36 | Allocation: sequence      | <a href="#">#16a</a> | Method of generating the allocation sequence (eg,          | 9   |
| 37 | generation                |                      | computer-generated random numbers), and list of any        |     |
| 38 |                           |                      | factors for stratification. To reduce predictability of a  |     |
| 39 |                           |                      | random sequence, details of any planned restriction (eg,   |     |
| 40 |                           |                      | blocking) should be provided in a separate document that   |     |
| 41 |                           |                      | is unavailable to those who enrol participants or assign   |     |
| 42 |                           |                      | interventions                                              |     |
| 43 |                           |                      |                                                            |     |
| 44 |                           |                      |                                                            |     |
| 45 |                           |                      |                                                            |     |
| 46 |                           |                      |                                                            |     |
| 47 |                           |                      |                                                            |     |
| 48 |                           |                      |                                                            |     |
| 49 |                           |                      |                                                            |     |
| 50 |                           |                      |                                                            |     |
| 51 |                           |                      |                                                            |     |
| 52 |                           |                      |                                                            |     |
| 53 | Allocation                | <a href="#">#16b</a> | Mechanism of implementing the allocation sequence (eg,     | 9   |
| 54 | concealment               |                      | central telephone; sequentially numbered, opaque,          |     |
| 55 |                           |                      |                                                            |     |
| 56 |                           |                      |                                                            |     |
| 57 |                           |                      |                                                            |     |
| 58 | mechanism                 |                      |                                                            |     |
| 59 |                           |                      |                                                            |     |
| 60 |                           |                      |                                                            |     |

|    |                        |                                                                                 |       |
|----|------------------------|---------------------------------------------------------------------------------|-------|
| 1  |                        | sealed envelopes), describing any steps to conceal the                          |       |
| 2  |                        |                                                                                 |       |
| 3  |                        | sequence until interventions are assigned                                       |       |
| 4  |                        |                                                                                 |       |
| 5  |                        |                                                                                 |       |
| 6  | Allocation:            | <a href="#">#16c</a> Who will generate the allocation sequence, who will enrol  | 9     |
| 7  |                        |                                                                                 |       |
| 8  | implementation         | participants, and who will assign participants to                               |       |
| 9  |                        |                                                                                 |       |
| 10 |                        | interventions                                                                   |       |
| 11 |                        |                                                                                 |       |
| 12 |                        |                                                                                 |       |
| 13 | Blinding (masking)     | <a href="#">#17a</a> Who will be blinded after assignment to interventions (eg, | 9     |
| 14 |                        |                                                                                 |       |
| 15 |                        | trial participants, care providers, outcome assessors, data                     |       |
| 16 |                        |                                                                                 |       |
| 17 |                        | analysts), and how                                                              |       |
| 18 |                        |                                                                                 |       |
| 19 |                        |                                                                                 |       |
| 20 |                        |                                                                                 |       |
| 21 | Blinding (masking):    | <a href="#">#17b</a> If blinded, circumstances under which unblinding is        | N/A   |
| 22 |                        |                                                                                 |       |
| 23 | emergency              | permissible, and procedure for revealing a participant's                        |       |
| 24 |                        |                                                                                 |       |
| 25 | unblinding             | allocated intervention during the trial                                         |       |
| 26 |                        |                                                                                 |       |
| 27 |                        |                                                                                 |       |
| 28 |                        |                                                                                 |       |
| 29 | <b>Methods: Data</b>   |                                                                                 |       |
| 30 |                        |                                                                                 |       |
| 31 | <b>collection,</b>     |                                                                                 |       |
| 32 |                        |                                                                                 |       |
| 33 | <b>management, and</b> |                                                                                 |       |
| 34 |                        |                                                                                 |       |
| 35 | <b>analysis</b>        |                                                                                 |       |
| 36 |                        |                                                                                 |       |
| 37 |                        |                                                                                 |       |
| 38 |                        |                                                                                 |       |
| 39 | Data collection plan   | <a href="#">#18a</a> Plans for assessment and collection of outcome,            | 10-15 |
| 40 |                        |                                                                                 |       |
| 41 |                        | baseline, and other trial data, including any related                           |       |
| 42 |                        |                                                                                 |       |
| 43 |                        | processes to promote data quality (eg, duplicate                                |       |
| 44 |                        |                                                                                 |       |
| 45 |                        | measurements, training of assessors) and a description                          |       |
| 46 |                        |                                                                                 |       |
| 47 |                        | of study instruments (eg, questionnaires, laboratory tests)                     |       |
| 48 |                        |                                                                                 |       |
| 49 |                        | along with their reliability and validity, if known. Reference                  |       |
| 50 |                        |                                                                                 |       |
| 51 |                        | to where data collection forms can be found, if not in the                      |       |
| 52 |                        |                                                                                 |       |
| 53 |                        | protocol                                                                        |       |
| 54 |                        |                                                                                 |       |
| 55 |                        |                                                                                 |       |
| 56 |                        |                                                                                 |       |
| 57 |                        |                                                                                 |       |
| 58 |                        |                                                                                 |       |
| 59 |                        |                                                                                 |       |
| 60 |                        |                                                                                 |       |

|    |                            |                      |                                                                |     |
|----|----------------------------|----------------------|----------------------------------------------------------------|-----|
| 1  | Data collection plan:      | <a href="#">#18b</a> | Plans to promote participant retention and complete            | N/A |
| 2  |                            |                      |                                                                |     |
| 3  | retention                  |                      | follow-up, including list of any outcome data to be            |     |
| 4  |                            |                      | collected for participants who discontinue or deviate from     |     |
| 5  |                            |                      | intervention protocols                                         |     |
| 6  |                            |                      |                                                                |     |
| 7  |                            |                      |                                                                |     |
| 8  |                            |                      |                                                                |     |
| 9  |                            |                      |                                                                |     |
| 10 |                            |                      |                                                                |     |
| 11 | Data management            | <a href="#">#19</a>  | Plans for data entry, coding, security, and storage,           | N/A |
| 12 |                            |                      | including any related processes to promote data quality        |     |
| 13 |                            |                      | (eg, double data entry; range checks for data values).         |     |
| 14 |                            |                      | Reference to where details of data management                  |     |
| 15 |                            |                      | procedures can be found, if not in the protocol                |     |
| 16 |                            |                      |                                                                |     |
| 17 |                            |                      |                                                                |     |
| 18 | Statistics: outcomes       | <a href="#">#20a</a> | Statistical methods for analysing primary and secondary        | 14  |
| 19 |                            |                      | outcomes. Reference to where other details of the              |     |
| 20 |                            |                      | statistical analysis plan can be found, if not in the protocol |     |
| 21 |                            |                      |                                                                |     |
| 22 |                            |                      |                                                                |     |
| 23 | Statistics: additional     | <a href="#">#20b</a> | Methods for any additional analyses (eg, subgroup and          | 14  |
| 24 |                            |                      | adjusted analyses)                                             |     |
| 25 | analyses                   |                      |                                                                |     |
| 26 |                            |                      |                                                                |     |
| 27 |                            |                      |                                                                |     |
| 28 | Statistics: analysis       | <a href="#">#20c</a> | Definition of analysis population relating to protocol non-    | 14  |
| 29 |                            |                      | adherence (eg, as randomised analysis), and any                |     |
| 30 | population and             |                      | statistical methods to handle missing data (eg, multiple       |     |
| 31 | missing data               |                      | imputation)                                                    |     |
| 32 |                            |                      |                                                                |     |
| 33 |                            |                      |                                                                |     |
| 34 |                            |                      |                                                                |     |
| 35 |                            |                      |                                                                |     |
| 36 |                            |                      |                                                                |     |
| 37 |                            |                      |                                                                |     |
| 38 |                            |                      |                                                                |     |
| 39 |                            |                      |                                                                |     |
| 40 |                            |                      |                                                                |     |
| 41 |                            |                      |                                                                |     |
| 42 |                            |                      |                                                                |     |
| 43 |                            |                      |                                                                |     |
| 44 |                            |                      |                                                                |     |
| 45 |                            |                      |                                                                |     |
| 46 | <b>Methods: Monitoring</b> |                      |                                                                |     |
| 47 |                            |                      |                                                                |     |
| 48 |                            |                      |                                                                |     |
| 49 | Data monitoring:           | <a href="#">#21a</a> | Composition of data monitoring committee (DMC);                | N/A |
| 50 |                            |                      | summary of its role and reporting structure; statement of      |     |
| 51 | formal committee           |                      | whether it is independent from the sponsor and                 |     |
| 52 |                            |                      | competing interests; and reference to where further            |     |
| 53 |                            |                      |                                                                |     |
| 54 |                            |                      |                                                                |     |
| 55 |                            |                      |                                                                |     |
| 56 |                            |                      |                                                                |     |
| 57 |                            |                      |                                                                |     |
| 58 |                            |                      |                                                                |     |
| 59 |                            |                      |                                                                |     |
| 60 |                            |                      |                                                                |     |

1 details about its charter can be found, if not in the  
 2 protocol. Alternatively, an explanation of why a DMC is  
 3 not needed  
 4  
 5  
 6  
 7

|                                                                                        |                                                     |                                                                                                                                                                                                                                                                 |     |
|----------------------------------------------------------------------------------------|-----------------------------------------------------|-----------------------------------------------------------------------------------------------------------------------------------------------------------------------------------------------------------------------------------------------------------------|-----|
| 8<br>9<br>10<br>11<br>12<br>13<br>14<br>15<br>16<br>17                                 | Data monitoring:<br>interim analysis                | <a href="#">#21b</a> Description of any interim analyses and stopping<br>guidelines, including who will have access to these<br>interim results and make the final decision to terminate<br>the trial                                                           | N/A |
| 18<br>19<br>20<br>21<br>22<br>23<br>24<br>25<br>26<br>27                               | Harms                                               | <a href="#">#22</a> Plans for collecting, assessing, reporting, and managing<br>solicited and spontaneously reported adverse events and<br>other unintended effects of trial interventions or trial<br>conduct                                                  | N/A |
| 28<br>29<br>30<br>31<br>32<br>33<br>34<br>35<br>36<br>37<br>38<br>39<br>40             | Auditing<br><br><b>Ethics and<br/>dissemination</b> | <a href="#">#23</a> Frequency and procedures for auditing trial conduct, if<br>any, and whether the process will be independent from<br>investigators and the sponsor                                                                                           | N/A |
| 41<br>42<br>43<br>44<br>45                                                             | Research ethics<br>approval                         | <a href="#">#24</a> Plans for seeking research ethics committee / institutional<br>review board (REC / IRB) approval                                                                                                                                            | 6   |
| 46<br>47<br>48<br>49<br>50<br>51<br>52<br>53<br>54<br>55<br>56<br>57<br>58<br>59<br>60 | Protocol<br>amendments                              | <a href="#">#25</a> Plans for communicating important protocol modifications<br>(eg, changes to eligibility criteria, outcomes, analyses) to<br>relevant parties (eg, investigators, REC / IRBs, trial<br>participants, trial registries, journals, regulators) | N/A |



|    |                       |                      |                                                                |     |
|----|-----------------------|----------------------|----------------------------------------------------------------|-----|
| 1  | Consent or assent     | <a href="#">#26a</a> | Who will obtain informed consent or assent from potential      | 9   |
| 2  |                       |                      | trial participants or authorised surrogates, and how (see      |     |
| 3  |                       |                      | Item 32)                                                       |     |
| 4  |                       |                      |                                                                |     |
| 5  |                       |                      |                                                                |     |
| 6  |                       |                      |                                                                |     |
| 7  |                       |                      |                                                                |     |
| 8  |                       |                      |                                                                |     |
| 9  | Consent or assent:    | <a href="#">#26b</a> | Additional consent provisions for collection and use of        | N/A |
| 10 | ancillary studies     |                      | participant data and biological specimens in ancillary         |     |
| 11 |                       |                      | studies, if applicable                                         |     |
| 12 |                       |                      |                                                                |     |
| 13 |                       |                      |                                                                |     |
| 14 |                       |                      |                                                                |     |
| 15 |                       |                      |                                                                |     |
| 16 | Confidentiality       | <a href="#">#27</a>  | How personal information about potential and enrolled          | N/A |
| 17 |                       |                      | participants will be collected, shared, and maintained in      |     |
| 18 |                       |                      | order to protect confidentiality before, during, and after     |     |
| 19 |                       |                      | the trial                                                      |     |
| 20 |                       |                      |                                                                |     |
| 21 |                       |                      |                                                                |     |
| 22 |                       |                      |                                                                |     |
| 23 |                       |                      |                                                                |     |
| 24 |                       |                      |                                                                |     |
| 25 |                       |                      |                                                                |     |
| 26 | Declaration of        | <a href="#">#28</a>  | Financial and other competing interests for principal          | 17  |
| 27 | interests             |                      | investigators for the overall trial and each study site        |     |
| 28 |                       |                      |                                                                |     |
| 29 |                       |                      |                                                                |     |
| 30 |                       |                      |                                                                |     |
| 31 | Data access           | <a href="#">#29</a>  | Statement of who will have access to the final trial           | N/A |
| 32 |                       |                      | dataset, and disclosure of contractual agreements that         |     |
| 33 |                       |                      | limit such access for investigators                            |     |
| 34 |                       |                      |                                                                |     |
| 35 |                       |                      |                                                                |     |
| 36 |                       |                      |                                                                |     |
| 37 |                       |                      |                                                                |     |
| 38 |                       |                      |                                                                |     |
| 39 | Ancillary and post    | <a href="#">#30</a>  | Provisions, if any, for ancillary and post-trial care, and for | N/A |
| 40 | trial care            |                      | compensation to those who suffer harm from trial               |     |
| 41 |                       |                      | participation                                                  |     |
| 42 |                       |                      |                                                                |     |
| 43 |                       |                      |                                                                |     |
| 44 |                       |                      |                                                                |     |
| 45 |                       |                      |                                                                |     |
| 46 |                       |                      |                                                                |     |
| 47 | Dissemination policy: | <a href="#">#31a</a> | Plans for investigators and sponsor to communicate trial       | N/A |
| 48 | trial results         |                      | results to participants, healthcare professionals, the         |     |
| 49 |                       |                      | public, and other relevant groups (eg, via publication,        |     |
| 50 |                       |                      | reporting in results databases, or other data sharing          |     |
| 51 |                       |                      | arrangements), including any publication restrictions          |     |
| 52 |                       |                      |                                                                |     |
| 53 |                       |                      |                                                                |     |
| 54 |                       |                      |                                                                |     |
| 55 |                       |                      |                                                                |     |
| 56 |                       |                      |                                                                |     |
| 57 |                       |                      |                                                                |     |
| 58 |                       |                      |                                                                |     |
| 59 |                       |                      |                                                                |     |
| 60 |                       |                      |                                                                |     |

1 Dissemination policy: [#31b](#) Authorship eligibility guidelines and any intended use of N/A  
 2 authorship professional writers  
 3  
 4

5  
 6 Dissemination policy: [#31c](#) Plans, if any, for granting public access to the full N/A  
 7 reproducible protocol, participant-level dataset, and statistical code  
 8  
 9 research  
 10  
 11

## 12 Appendices

13  
 14  
 15  
 16  
 17 Informed consent [#32](#) Model consent form and other related documentation N/A  
 18 materials given to participants and authorised surrogates  
 19  
 20

21  
 22  
 23 Biological specimens [#33](#) Plans for collection, laboratory evaluation, and storage of N/A  
 24 biological specimens for genetic or molecular analysis in  
 25 the current trial and for future use in ancillary studies, if  
 26 applicable  
 27  
 28  
 29  
 30  
 31

32  
 33 The SPIRIT Explanation and Elaboration paper is distributed under the terms of the Creative  
 34 Commons Attribution License CC-BY-NC. This checklist was completed on 15. February 2022 using  
 35 <https://www.goodreports.org/>, a tool made by the [EQUATOR Network](#) in collaboration with  
 36 [Penelope.ai](#)  
 37  
 38  
 39  
 40  
 41  
 42  
 43  
 44  
 45  
 46  
 47  
 48  
 49  
 50  
 51  
 52  
 53  
 54  
 55  
 56  
 57  
 58  
 59  
 60

# BMJ Open

## A 16-week multicenter randomized controlled trial to study the effect of the consumption of an oat beta-glucan enriched bread versus a wholegrain wheat bread on glycemic control among persons with pre-diabetes- a study protocol of The CarbHealth study

|                                 |                                                                                                                                                                                                                                                                                                                                                                                                                                                                                                                                                                                                                                                                                                                                                                                                                                                                                                                                                                                                                                                                                                                                                                                        |
|---------------------------------|----------------------------------------------------------------------------------------------------------------------------------------------------------------------------------------------------------------------------------------------------------------------------------------------------------------------------------------------------------------------------------------------------------------------------------------------------------------------------------------------------------------------------------------------------------------------------------------------------------------------------------------------------------------------------------------------------------------------------------------------------------------------------------------------------------------------------------------------------------------------------------------------------------------------------------------------------------------------------------------------------------------------------------------------------------------------------------------------------------------------------------------------------------------------------------------|
| Journal:                        | <i>BMJ Open</i>                                                                                                                                                                                                                                                                                                                                                                                                                                                                                                                                                                                                                                                                                                                                                                                                                                                                                                                                                                                                                                                                                                                                                                        |
| Manuscript ID                   | bmjopen-2022-062066.R1                                                                                                                                                                                                                                                                                                                                                                                                                                                                                                                                                                                                                                                                                                                                                                                                                                                                                                                                                                                                                                                                                                                                                                 |
| Article Type:                   | Protocol                                                                                                                                                                                                                                                                                                                                                                                                                                                                                                                                                                                                                                                                                                                                                                                                                                                                                                                                                                                                                                                                                                                                                                               |
| Date Submitted by the Author:   | 01-Jul-2022                                                                                                                                                                                                                                                                                                                                                                                                                                                                                                                                                                                                                                                                                                                                                                                                                                                                                                                                                                                                                                                                                                                                                                            |
| Complete List of Authors:       | Hjorth, Therese; Chalmers University of Technology, Department of Biology and Biological Engineering<br>Schadow, Alena; Paderborn University<br>Revheim, Ingrid; University of Bergen, Department of Clinical Medicine<br>Spielau, Ulrike; University of Bergen, Department of Clinical Medicine; Leipzig University<br>Thomassen, Lise M.; University of Bergen, Department of Clinical Medicine<br>Meyer, Klara; Leipzig University<br>Piotrowski, Katja; Leipzig University<br>Rosendahl-Riise, Hanne; University of Bergen, Department of Clinical Medicine<br>Rieder, Anne; Norwegian Institute of Food Fisheries and Aquaculture Research<br>Varela, Paula; Norwegian Institute of Food Fisheries and Aquaculture Research<br>Lysne, Vegard ; Haukeland University Hospital, Department of Heart Disease; University of Bergen, Department of Clinical Science<br>Ballance, Simon; Norwegian Institute of Food Fisheries and Aquaculture Research<br>Koerner, Antje; Leipzig University<br>Landberg, Rikard; Chalmers University of Technology, Department of Biology and Biological Engineering<br>Buyken, Anette; Paderborn University<br>Dierkes, Jutta; Paderborn University |
| <b>Primary Subject Heading</b>: | Diabetes and endocrinology                                                                                                                                                                                                                                                                                                                                                                                                                                                                                                                                                                                                                                                                                                                                                                                                                                                                                                                                                                                                                                                                                                                                                             |
| Secondary Subject Heading:      | Global health, Health policy, Nutrition and metabolism                                                                                                                                                                                                                                                                                                                                                                                                                                                                                                                                                                                                                                                                                                                                                                                                                                                                                                                                                                                                                                                                                                                                 |
| Keywords:                       | General diabetes < DIABETES & ENDOCRINOLOGY, PUBLIC HEALTH, Clinical trials < THERAPEUTICS                                                                                                                                                                                                                                                                                                                                                                                                                                                                                                                                                                                                                                                                                                                                                                                                                                                                                                                                                                                                                                                                                             |
|                                 |                                                                                                                                                                                                                                                                                                                                                                                                                                                                                                                                                                                                                                                                                                                                                                                                                                                                                                                                                                                                                                                                                                                                                                                        |

1  
2  
3  
4  
5  
6  
7  
8  
9  
10  
11  
12  
13  
14  
15  
16  
17  
18  
19  
20  
21  
22  
23  
24  
25  
26  
27  
28  
29  
30  
31  
32  
33  
34  
35  
36  
37  
38  
39  
40  
41  
42  
43  
44  
45  
46  
47  
48  
49  
50  
51  
52  
53  
54  
55  
56  
57  
58  
59  
60

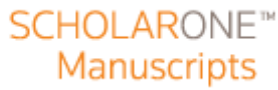

1  
2  
3 **A 16-week multicenter randomized controlled trial to study the effect of the**  
4 **consumption of an oat beta-glucan enriched bread versus a wholegrain**  
5 **wheat bread on glycemic control among persons with pre-diabetes: a study**  
6 **protocol of The CarbHealth study**  
7  
8  
9  
10  
11  
12  
13

14 **Authors: The CarbHealth-consortium**

15 **Therese Hjorth<sup>1</sup>✉, Alena Schadow<sup>2</sup>, Ingrid Revheim<sup>3</sup>, Ulrike Spielau<sup>4,5</sup>, Lise M. Thomassen<sup>3</sup>**  
16 **Klara Meyer<sup>5</sup>, Katja Piotrowski<sup>5</sup>, Hanne Rosendahl-Riise<sup>4</sup>, Anne Rieder<sup>6</sup>, Paula Varela<sup>6</sup>,**  
17 **Vegard Lysne<sup>7,8</sup>, Simon Ballance<sup>6</sup>, Antje Koerner<sup>5</sup>, Rikard Landberg<sup>1</sup>, Anette Buyken<sup>2</sup>, Jutta**  
18 **Dierkes<sup>2</sup>**  
19  
20  
21  
22

23 <sup>1</sup> Chalmers University of Technology, Department of Biology and Biological Engineering,  
24 Division of Food and Nutrition Science. Gothenburg, Sweden.

25 <sup>2</sup> Institute of Nutrition, Consumption and Health, Faculty of Natural Sciences, Paderborn  
26 University, Germany  
27  
28

29 <sup>3</sup>Centre for Nutrition, Department of Clinical Medicine, University of Bergen, Bergen,  
30 Norway  
31  
32

33 <sup>4</sup> Mohn Nutrition Research Laboratory and Centre for Nutrition, Department of Clinical  
34 Medicine, University of Bergen, Bergen, Norway  
35  
36

37 <sup>5</sup>Center for Pediatric Research (CPL), Hospital for Children and Adolescents, Medical Faculty,  
38 Leipzig University, Leipzig, Germany  
39  
40

41 <sup>6</sup>Nofima AS, Norwegian Institute of Food, Fisheries and Aquaculture Research, Ås, Norway  
42

43 <sup>7</sup>Department of Heart Disease, Haukeland University Hospital, Bergen, Norway  
44

45 <sup>8</sup>Mohn Nutrition Research Laboratory and Centre for Nutrition, Department of Clinical  
46 Science, University of Bergen, Bergen, Norway  
47

48 <sup>✉</sup>Corresponding author

49 Therese Hjorth

50 Kemigården 4

51 412 39 Gothenburg, Sweden

52 Telephone: +46 0723 619 444

53 E-mail: Therese.Hjorth@chalmers.se  
54  
55  
56  
57  
58  
59  
60

1  
2  
3 Wordcount abstract: 239

4  
5 Wordcount manuscript: 4314

6  
7  
8  
9 Therese Hjorth, Corresponding author: [Therese.hjorth@chalmers.se](mailto:Therese.hjorth@chalmers.se)

10 Alena Schadow: [alena.marie.schadow@uni-paderborn.de](mailto:alena.marie.schadow@uni-paderborn.de)

11  
12 Ingrid Revheim: [Ingrid.Revheim@uib.no](mailto:Ingrid.Revheim@uib.no)

13  
14 Ulrike Spielau: [Ulrike.Spielau@uib.no](mailto:Ulrike.Spielau@uib.no)

15  
16 Lise M. Thomassen: [lise.thomassen@uib.no](mailto:lise.thomassen@uib.no)

17  
18 Klara Meyer: [klara.meyer@medizin.uni-leipzig.de](mailto:klara.meyer@medizin.uni-leipzig.de)

19  
20 Katja Piotrowski: [katja.piotrowski@medizin.uni-leipzig.de](mailto:katja.piotrowski@medizin.uni-leipzig.de)

21  
22 Hanne Rosendahl-Riise: [Hanne.Rosendahl-Riise@uib.no](mailto:Hanne.Rosendahl-Riise@uib.no)

23  
24 Anne Rieder: [anne.rieder@nofima.no](mailto:anne.rieder@nofima.no)

25  
26 Paula Varela: [paula.varela.tomasco@nofima.no](mailto:paula.varela.tomasco@nofima.no)

27  
28 Antje Koerner: [antje.koerner@medizin.uni-leipzig.de](mailto:antje.koerner@medizin.uni-leipzig.de)

29  
30 Rikard Landberg: [Rikard.landberg@chalmers.se](mailto:Rikard.landberg@chalmers.se)

31  
32 Vegard Lysne: [vegard.lysne@uib.no](mailto:vegard.lysne@uib.no)

33  
34 Simon Ballance: [simon.ballance@nofima.no](mailto:simon.ballance@nofima.no)

35  
36 Anette Buyken: [anette.buyken@uni-paderborn.de](mailto:anette.buyken@uni-paderborn.de)

37  
38 Jutta Dierkes: [Jutta.Dierkes@uib.no](mailto:Jutta.Dierkes@uib.no)

## Abstract

**Introduction** In 2012, the estimated global prevalence of pre-diabetes was 280 million, and the prevalence is expected to rise to 400 million by 2030. Oat-based foods are a good source of beta-glucans, which have been shown to lower postprandial blood glucose. Studies to evaluate the effectiveness of the long-term intake of beta-glucan-enriched bread as part of a habitual diet among individuals with prediabetes are needed. Therefore, we designed a multicenter intervention study in adults with pre-diabetes to investigate the effects of consumption of an oat-derived beta-glucan-enriched bread as part of a normal diet on HbA1c in comparison to consumption of a wholegrain wheat bread.

**Method and analysis** The CarbHealth trial is a multi-center double-blind randomized controlled 16-week dietary intervention trial in participants 40-70 years of age with a BMI $\geq$ 27 kg/m<sup>2</sup> and HbA1c 35-50 mmol/mol. The study is conducted at four universities located in Norway, Sweden and Germany and uses intervention breads specifically designed for the trial by Nofima AS. The aim is to recruit 250 participants. The primary outcome is the difference in HbA1c between the intervention and the control group. The main analysis will include intervention group, study center, and baseline HbA1c as independent variables in an ANCOVA-model.

**Ethics and dissemination** The study protocol was approved by respective ethic authorities in participating countries. The results of the study will be communicated through publication in international scientific journals and presentations at (inter)national conferences.

**Trial registration number** Clinical trials: NCT04994327.

## Article summary

### Strengths and limitations of this study

- The multicenter study takes advantage of the expertise of different groups, thus adding microbiota research, chronotype and continuous glucose measurements as well as consumer acceptance to the study outcomes.
- Furthermore, collaboration with food technologists that were able to design, produce and extensively characterize a beta-glucan-enriched bread is an additional strength of the multicenter study.
- The intervention bread contains > 4 g beta-glucan per 30 g available carbohydrate and qualifies for an EFSA health claim on reduction of post-prandial glycaemic response.
- Due to logistics, breads had to be provided frozen, which is known to reduce bread quality and could lower consumer acceptance.

### *Keywords*

Hyperglycemia

Beta-glucan

Pre-diabetes



## Introduction

The prevalence of type 2 diabetes mellitus (T2D) has increased drastically over the last 35 years and is expected to continue to rise (1, 2). Impaired glucose tolerance (IGT) and impaired fasting glycemia (IGF) are intermediate conditions between normal glucose metabolism and T2D and are often referred to as pre-diabetes. In 2012, the International Diabetes Federation estimated the global prevalence of pre-diabetes to 280 million, which is expected to rise to 400 million by 2030 (3). Persons with pre-diabetes are at high risk of developing T2D, and it is estimated that 70% of those with pre-diabetes may develop T2D within 10 years (3, 4). Glycated hemoglobin (HbA1c) is used as a measure of glycemic control since HbA1c reflects average plasma glucose over the previous eight to twelve weeks. Common diagnostic criteria of pre-diabetes is an intermediate HbA1c of 42-47 mmol/mol (5). The causes and etiology of IGT and IGF are not fully understood, but there are strong links to obesity, age, ethnicity as well as heredity, and nutrition (6-8). Cereal grain products, especially bread, are staple foods in European diets and cereals are the main source of carbohydrate, plant protein, dietary fiber, and total energy world-wide (9). High whole grain and cereal fiber intake have consistently been associated with lower risks of T2D (10). Hence, replacing refined grains with dietary fiber-rich whole grains is regarded as a major strategy to improve public health (11). Oat- or barley-based foods are a good source of mixed-linkage beta-glucans, i.e., viscous forming dietary fiber, which have been shown to improve postprandial blood glucose. This has been endorsed through authorized health claims by the European Food Safety Authority (EFSA). However, few studies have investigated the long-term effect of breads enriched with beta-glucans on HbA1c and thereby the risk of developing T2D (12-14). The existing studies are of small sample sizes and uses a high amount of test food (8 servings per day = 320 g bread), thus not reflecting average consumption conditions. A recent study investigated the efficacy of beta-glucans on blood lipid profile and fasting plasma glucose in a cross-over study on 83 subjects, showing significant effects on blood lipid profile but not on fasting blood glucose. However, the participants were euglycemic and the dose of beta-glucan was comparably low (3 g/d) and provided under strictly controlled conditions (15). Hence, there is a need for studies to evaluate the effectiveness of the long-term intake of feasible amounts of bread enriched in beta-glucan as part of a habitual diet on diabetes risk factors particularly among individuals at elevated risk.

1  
2  
3 Therefore, we designed a multicenter intervention study in adults with a moderate to high  
4 risk of developing T2D i.e., persons with pre-diabetes to evaluate the long-term effects of  
5 regular consumption of an oat-derived beta-glucan-enriched bread, as part of a normal diet  
6 on HbA1c, in comparison to consumption of a wholegrain wheat bread. Furthermore,  
7 exploratory analysis will be performed assessing effects on fasting blood glucose and serum  
8 lipid profile, body weight, hepatic steatosis markers, 24 h glucose profiles, gastric emptying,  
9 changes in microbiota but also consumer acceptance and attrition rates.  
10  
11  
12  
13  
14  
15  
16  
17

### 18 **Methods/design**

19 The CarbHealth trial is a multi-center double-blind randomized controlled 16-week dietary  
20 intervention trial in participants with high normal HbA1c concentrations. The study is  
21 conducted at four University centers at i) University of Bergen- Bergen, Norway, ii) Chalmers  
22 University of Technology- Gothenburg, Sweden, iii) Paderborn University- Paderborn,  
23 Germany, and iv) Leipzig University- Leipzig, Germany. Intervention breads were specifically  
24 produced for the study by Nofima (Ås, Norway). This study was initiated in July 2019 and the  
25 recruitment started in July 2021. The trial is expected to be finalized by summer 2023.  
26  
27  
28  
29  
30  
31  
32  
33

### 34 **Ethics and dissemination**

35 The study protocol was approved by the respective ethic authorities (Swedish Ethical Review  
36 Authority, Sweden (Protocol DNR 2021-02584), Ethical committee of Paderborn University,  
37 Paderborn (approved 13 July 2021), Ethic Committee of the Medical Faculty of the University  
38 of Leipzig, Leipzig (316/21-ek), Regional Committees for Medical and Health Research Ethics,  
39 Norway (REC Nord, ref. 106931)). The study is registered in the public trial registry  
40 *Clinicaltrials.gov* (NCT04994327). The results of the study will be communicated through  
41 publication in international scientific journals and presentations at (inter)national  
42 conferences.  
43  
44  
45  
46  
47  
48  
49  
50  
51

### 52 **Patient and public involvement**

53 Participants and public were not involved in designing this study. Results will be presented  
54 to participants at the end of the trial. Participants will receive information on allocated  
55 group, HbA1c, blood lipids and body composition.  
56  
57  
58  
59  
60

## Experimental design

Prior to the intervention, potential participants take part in a pre-screening evaluation to assess eligibility for inclusion, either by phone, or using an online questionnaire. If eligible, a screening visit is booked. At the subsequent screening visit, non-fasting blood samples are drawn and analyzed locally for HbA1c, liver enzymes and safety markers. Furthermore, height, body weight, waist circumference, and blood pressure are measured. Participants complete a medical history questionnaire including assessment of prescribed and non-prescribed medication in relation to exclusion criteria. If enrolled, clinical visits take place in weeks 0, 8 and 16. During the baseline visit, the intermediate visit at 8 weeks and the final visit at 16 weeks, measurements of body weight, body composition, waist circumference and blood pressure are made, fasting blood samples are drawn, and participants provide frozen fecal samples. In two centers (Gothenburg and Paderborn), continuous glucose monitoring (CGM) measurements are performed covering one week at baseline and at the end of the study. Participants are asked to maintain habitual diets and levels of physical activity during the study period. This is monitored by 6 in-study 24 h dietary recalls which are not pre-announced to the participants and by physical activity questionnaires at the study visits. An overview of the study design is presented in **Figure 1**. During the intervention period, participants are instructed to replace their usually consumed bread with the study breads. The participants are asked to consume at least 3 slices of the pre-sliced intervention bread or the pre-sliced control bread on at least 6 days per week for 16 weeks.

**Figure 1.** Flowchart over the study visits in CarbHealth multicenter study.

## Study bread

The ingredients for the breads are shown in **Table 1** and the calculated nutrient composition in **Table 2**. The two breads were matched for starch and fat content on a slice basis (**Table 2**). The daily portion of three slices of the beta-glucan enriched bread provide 286 kcal, 16.6 g dietary fiber and 6 g of beta-glucan. Three slices of the wheat bread provide 244 kcal, 5 g dietary fiber, and 0.02 g beta-glucan per day (**Table 2**). Both breads were developed and distributed by Nofima AS, Norway. The breads were baked at Åpent Bakeri, Oslo, Norway. The

bread is provided frozen in vacuum packs of 6 slices and free of charge to the participants.

**Table 1: Ingredients for beta-glucan and control bread.**

| Ingredients               | Supplier                    | Beta-glucan bread (%) | Control bread (%) |
|---------------------------|-----------------------------|-----------------------|-------------------|
| Rapeseed oil              | Idun Industri AS, Norway    | 0.7                   | 4.7               |
| Dry yeast                 | Idun Industri AS, Norway    | 0.7                   | 0.6               |
| Salt                      | GC Rieber AS, Norway        | 1.0                   | 1.0               |
| Sieved white wheat flour  | Lantmännen Cerealia, Norway | 21.9                  | 18.7              |
| Wholegrain wheat flour    | Lantmännen Cerealia, Norway | 0                     | 37.5              |
| Water                     | Oslo kommune, Norway        | 53.8                  | 37.5              |
| SWEOAT® Bran BG14 Bakery  | Swedish Oat fiber, Sweden   | 21.9                  | 0                 |
| Coatec sorbic acid (E200) | RAPS GmbH Co. KG, Germany   | 0.05                  | 0.05              |

**Table 2: -Macronutrient composition of test breads**

| <b>Beta-glucan bread (intervention)</b> |         |                  |          |
|-----------------------------------------|---------|------------------|----------|
|                                         | g/slice | g/day (3 slices) | kcal/day |
| starch                                  | 12.2    | 36.7             | 146.7    |
| fat                                     | 2.1     | 6.3              | 56.8     |
| beta-glucan                             | 2.0     | 6.0              |          |
| protein                                 | 4.1     | 12.4             | 49.4     |
| fiber                                   | 5.5     | 16.5             | 32.9     |
| salt                                    | 0.6     | 1.8              |          |
| Moisture                                | 24.8    | 74.4             |          |
| Total                                   | 50.7    | 152.1            | 285.9    |

| <b>Whole grain Wheat bread (Control)</b> |         |                  |          |
|------------------------------------------|---------|------------------|----------|
|                                          | g/slice | g/day (3 slices) | kcal/day |
| starch                                   | 12.3    | 36.9             | 148.0    |
| fat                                      | 2.1     | 6.2              | 56.0     |
| beta-glucan                              | 0.02    | 0.06             |          |
| protein                                  | 2.5     | 7.5              | 29.9     |

|          |      |      |       |
|----------|------|------|-------|
| fiber    | 1.6  | 4.8  | 9.8   |
| salt     | 0.4  | 1.20 |       |
| Moisture | 11.4 |      |       |
| Total    | 30.4 | 91.2 | 243.7 |

### Eligibility criteria

The eligibility criteria were designed to reach people with pre-diabetes; hence, we invite men and women with BMI  $\geq 27$  kg/m<sup>2</sup>, aged 40-70 years. Additional inclusion criteria: HbA1c  $\leq 50$  mmol/mol, signed informed consent, regular bread eater and having freezer capacity for at least 2 loafs of bread. Exclusion criteria are: type 1 diabetes mellitus or pharmacologically treated type 2 diabetes mellitus, non-fasting blood glucose  $> 11.1$  mmol/l, urine glucose  $\geq 180$  mg/dl, or protein excretion as indicated by dipstick (+++, Combur 10 test strips (Roche Diagnostics)), food allergies or intolerances preventing consumption of the study breads, pregnancy, lactation or planning a pregnancy during the study period, systolic blood pressure  $\geq 160$  mmHg or diastolic blood pressure  $\geq 100$  mmHg at screening (16), history of stomach or gastrointestinal conditions (i.e. inflammatory bowel disease, Crohn's disease) history of myocardial infarction, heart failure, stroke, heart attack or cancer within 3 years prior to screening, use of anti-diabetic agents or insulin, history of alcohol abuse. Use of other medications or over-the-counter drugs or dietary supplements are allowed if the dose has been stable for a minimum of 3 months prior to the study. Any medication used will be recorded as will any changes of use. Initiation of medication to treat diabetes during the study is a reason for withdrawal.

### Recruitment

In general, participants are recruited via leaflets, press releases, newspaper ads, ads in social media and blackboard flyers. Study specific websites are developed in Bergen and Paderborn, with the possibility for online registration. If a potential participant is interested, pre-screening will be conducted over the phone or using an online questionnaire to assess eligibility, and if eligible, a screening visit is scheduled.

### Informed consent procedure

1  
2  
3 All participants screened for eligibility are provided written information about the study prior  
4 to the first study visit. At the first study visit, the participants receive additional oral  
5 information on the study and are given the opportunity to ask questions to the research  
6 personnel before signing written informed consent. The study will not carry on and no  
7 samples will be drawn until the participant gives consent in writing. The participants have the  
8 right to withdraw their consent at any time, and to request that their biological samples and  
9 data will be destroyed.  
10  
11  
12  
13  
14  
15  
16  
17

### 18 **Randomization**

19 Participants are randomized into one of the two intervention groups (1:1 allocation) using  
20 block randomization with random block lengths, stratified by sex. The web-based  
21 randomization is configured by the Biostatistics and Data Management Group of the Clinical  
22 Trials Unit at the University Medical Center Göttingen, Germany, a third party not otherwise  
23 involved in the clinical trial. To reduce performance bias, at each of the four sites, a person,  
24 who is not member of the research team, is responsible for the randomization. All other  
25 research personnel at the sites are blinded for the allocation group.  
26  
27  
28  
29  
30  
31  
32  
33

### 34 **Dietary assessment**

35 The dietary assessment follows the principle of 24 h dietary recalls using country-specific food  
36 composition data. Practical conduction differs slightly between centers.  
37  
38  
39

40 Bergen, Paderborn, and Leipzig: Dietary intakes are assessed by six 24-hour  
41 recalls (24HR) at the beginning (weeks 0-2), middle (weeks 7-9) and end of the study (weeks  
42 15-16) using the validated tool “myfood24” (<https://www.myfood24.org/>). The 24HR are  
43 performed at unannounced times to attenuate the observer effect. The German version of  
44 myfood24 is based on German Food Code and Nutrient Database  
45 (Bundeslebensmittelschlüssel (BLS) version 3.02) for generic food items and the database of  
46 the Dortmund Nutritional and Anthropometric Longitudinally Designed (DONALD) study for  
47 branded food items (17, 18). The Norwegian version is based on the Norwegian Food  
48 Composition Table for generic food items and supplemented with food composition data for  
49 missing Norwegian dishes from other sources (19).  
50  
51  
52  
53  
54  
55  
56  
57

58 Gothenburg: As Myfood24© is not available based on Swedish food  
59 composition data, dietary intake is assessed by six 24HR on study site and over phone. Three  
60

1  
2  
3 24HR are performed at site by a trained dietitian, using images of portion sizes from The  
4 Swedish Food Agency. Additionally, three 24HR are performed over phone when the  
5 participants estimate portion sizes using a standard kitchen measure (e.g., dl measure and  
6 slices). To determine the nutritional composition of the intake, the DietistNet Pro software  
7 (Kost och Näringsdata AB, Bromma, Sweden) is used which is based on Swedish Food  
8 Composition Database.  
9  
10  
11  
12  
13  
14  
15

### 16 **Clinical assessments**

17  
18 Visits include collection of blood and urine samples, assessment of blood pressure, and  
19 anthropometric data including waist circumference, body weight and height, as well as body  
20 composition (described under “anthropometric measurements”). Participants are instructed  
21 to not eat or drink (except maximum 0.5L of non-carbonated water) 10 hours prior to the  
22 visits. Additionally, participants are instructed to avoid alcohol consumption, smoking and  
23 use of other tobacco products, and vigorous physical activity 12 h prior to the clinical visit.  
24  
25  
26  
27  
28  
29

### 30 **Consumer acceptance**

31  
32 Participants evaluate the bread on day 1 and on week 8 of the study. The questionnaire  
33 is adapted from a previously established method (20). Participants rate their hunger,  
34 acceptability, and expected satiation in a 9-point scale. The participants rate expected  
35 satiety on a 6-point scale. Participants describe the bread via a check-all-that-apply (CATA)  
36 question (20, 21), “Choose all the attributes/terms that you think apply to this bread”, using  
37 28 hedonic and descriptive attributes and 16 usage & attitude attributes. Terms are  
38 randomized within groups and across participants. They answer two consumption  
39 questions: “In which meals do you consume bread?” and “How many bread slices do you eat  
40 on a typical day”.  
41  
42  
43  
44  
45  
46  
47  
48

49 Data for Norway and Sweden were collected through online forms in EyeQuestion  
50 (Logic8 BV, The Netherlands) and stored in a secure server owned by Nofima. Participants  
51 from Germany filled in the questionnaire on paper.  
52  
53  
54  
55

### 56 **Blood collection and analysis**

57  
58 During study visits, fasting blood samples are taken from an antecubital vein and placed in  
59 tubes containing either a clot activator or lithium heparin (Becton-Dickinson, Eysins,  
60

1  
2  
3 Switzerland) to obtain serum or plasma. Serum tubes are stored at room temperature for 30  
4 minutes and then centrifuged at 1300g at 4°C for 10 minutes. Plasma tubes are immediately  
5 centrifuged except for one tube for HbA1c measurements. EDTA-plasma, serum and Li-  
6 Heparin plasma are immediately refrigerated/kept on ice, processed, and aliquoted into  
7 microtubes. Whole blood, plasma and serum aliquots are frozen at -20°C within 2 h of  
8 sample collection and transferred into -80°C within 24h. Blood samples are sent on dry ice  
9 to the Department of Medical Biochemistry and Pharmacology at Haukeland University  
10 Hospital, Bergen, every 6 weeks for analyses of HbA1c and secondary outcomes.  
11  
12  
13  
14  
15  
16  
17  
18  
19

### 20 **Analytical methods**

21 Blood glucose is measured by a validated, portable system at room temperature (HemoCue®  
22 Glucose 201 RT system (HemoCue AB, Ängelholm, Sweden) at all centers. All other blood or  
23 serum measurements will be done at Haukeland University Hospital, Bergen (certified  
24 laboratory NSEN-ISO 15189), in frozen samples stored at -80°C. HbA1c is measured in EDTA  
25 whole blood samples which have been stored at maximum for 8 weeks by HPLC (BioRad,  
26 Hercules, CA). Liver enzymes and plasma lipids are measured using standard methods on a  
27 Cobas c702 autoanalyzer. Liver enzymes are measured photometrically according to the IFCC  
28 method (Roche Diagnostics, Mannheim, Germany). Serum triacylglycerides and total  
29 cholesterol are measured with an enzymatic colorimetric method. LDL cholesterol is  
30 measured photometrically, and HDL cholesterol is measured by a homogeneous enzymatic  
31 colorimetric method.  
32  
33  
34  
35  
36  
37  
38  
39  
40  
41  
42  
43

### 44 **Dietary compliance**

45 Compliance is assessed based on the evaluation of the 24HR and a pre-coded compliance  
46 journal kept by the participant during the study. Participants are instructed to tick off the  
47 number of slices consumed on each day. Compliance is a secondary outcome and sensitivity  
48 analysis will be performed based on compliance journals and 24HR.  
49  
50  
51  
52  
53  
54

### 55 **Anthropometric assessments**

56 Body weight is measured during all study visits including screening, with the participants  
57 wearing light clothing (e.g., underwear and t-shirt) and no shoes. Body weight is noted to the  
58 nearest 0.1 kg in the case report form (CRF). Height is measured using a Seca Stadiometer,  
59  
60



1  
2  
3 model 217 or using the mBCA 515 integrated stadiometer. Height is measured once at  
4 screening without shoes to the nearest 0.1 cm. Waist circumference is measured twice on  
5 each occasion with a Seca 201 cm tape measurer to the nearest 0.1 cm according to WHO  
6 standards. The average of the two measurements are used for data analysis. Body  
7 composition (whole body mass, fat mass and lean body mass) is measured at all study visits  
8 by Bio-electrical Impedance Analysis using Seca mBCA 515 (in Bergen, Paderborn, and  
9 Leipzig). The measurements are performed in the morning after a 10 hour fast and in  
10 accordance with a standardized protocol.  
11  
12

13  
14  
15  
16  
17  
18 Gothenburg: Body composition is measured using a Dual Energy X-ray  
19 absorptiometry, DEXA (iDXA, GE Medical Systems, Madison, WI, USA) using the software Core  
20 version 18.0. The DEXA-scan is conducted in the morning after an overnight fast with the  
21 participants wearing light clothing.  
22  
23  
24  
25

### 26 27 **Twenty-four-hour continuous glucose monitoring**

28  
29 A continuous glucose monitoring device (CGM) is used (Gothenburg and Paderborn) to obtain  
30 24-h continuous interstitial glucose concentration data on two occasions for 7 days each  
31 between baseline and week 1 and between week 15 and week 16. CGM data is used to  
32 calculate 24-h interstitial glucose peak, mean, coefficient of variation (CV) and total area  
33 under the curve (AUC). In addition, glucose response to bread consumption is evaluated  
34 separately for morning and evening meals.  
35  
36  
37  
38  
39

40  
41  
42 The devices differ between centers and the specific devices are described below.

43  
44 In Paderborn: A Dexcom G6 CGM (DexCom Inc., San Diego, US) is used. The glucose  
45 oxidase sensor is inserted into the upper part of the non-dominant arm or the abdominal area  
46 at least 5 cm away from the umbilicus to obtain an interstitial glucose measurement. Self-  
47 monitoring glucose readings (finger sticks) are performed with a blood sugar monitoring  
48 device (CONTOUR<sup>®</sup>NEXT ONE, Ascencia Diabetes Care, US) twice per day (morning and  
49 evening). The sensor does not need to be calibrated.  
50  
51  
52

53  
54 In Gothenburg: An Abbott FreeStyle Libre Pro iQ CGM (Chicago, Illinois, US) is used. The  
55 glucose oxidase sensor is inserted into the back of the upper part of the non-dominant arm.  
56 Participants can wear the sensor for up to 14 days and it does not need to be calibrated.  
57  
58  
59  
60

## Fecal samples

Spot fecal samples are collected at baseline, week 8 and 16. Collection is voluntary, and non-delivery of fecal samples is not a reason for exclusion. The samples will be collected in specific devices (Easy Sampler Collection Kit, GP Medical Devices ApS, Denmark). The participants are instructed to collect the fecal sample within 72 h of the clinical visit and are instructed to keep the sample in a household freezer until delivery to the study center. The participants are instructed to keep the sample in a freezer bag with cooling blocks during transportation to the study center. At the study center the samples are transferred to  $-80^{\circ}\text{C}$  within 24 h. Samples are analyzed for the composition of the gut microbiota to provide possible mechanistic explanations underlying differential responses of participants of selected outcomes. All fecal microbiota analysis will be performed at Chalmers University of Technology (Gothenburg, Sweden).

### 2.10 Questionnaires

Participants complete several questionnaires during the study period. All questionnaires have been validated and are available in respective languages:

For physical activity assessment, participants complete the International Physical Activity Questionnaire (IPAQ) at baseline, week 8 and 16. The IPAQ is used to estimate daily inactivity and physical activity and has been shown to have adequate validity and reliability in various nationalities (22).

For chronotype, the Munich Chronotype Questionnaire (MCTQ) is administered at baseline, week 8 and 16 to estimate chronotype and sleep behavior during the trial. Chronotype is defined as the midpoint of sleep on free days corrected for sleep debt on workdays (MSFsc). Chronotype is also verified by use of an accelerometer in week 1 and 16 (Paderborn) (23).

For subjective health and well-being assessment, the 12-item Short Form Health Survey (RAND SF-12) is used at baseline, week 8 and 16. The questionnaire is used to evaluate perceived physical and emotional well-being.

For alcohol abuse, the four-question validated CAGE (Cut down, Annoyed, Guilty and Eye opener) questionnaire will be administered at screening visit to assess the risk of alcohol abuse.

#### 2.14. Study outcomes

The primary outcome is the difference in glycemic control measured by HbA1c after 16 weeks between the intervention and control group. The trial has defined the following secondary outcomes: I) difference in fasting capillary blood glucose after 16 weeks, II) difference in fat mass (kg) and lean body mass (kg), III) difference in blood lipids (LDL-C, HDL-C, triglycerides), IV) difference in fatty liver index (based on serum liver enzyme activities (ALT, AST)), changes in fecal microbiota composition, V) consumer acceptance at baseline and 8 weeks. Furthermore, the following exploratory investigations will be undertaken: I) difference in postprandial response to morning and evening meals with the two breads based on CGM-data (Paderborn and Gothenburg only), II) if the individual chronotype of a person influences bread consumption and metabolic health, III) analysis of plasma and fecal metabolome and short chain fatty acids in fecal and blood samples, and IV) sensitivity analysis of compliance to the protocol measured with 24 h recalls and compliance journal.

#### 2.15. Data analysis and sample size estimates

Intention-to-treat analysis will be performed following a statistical analysis plan that was set up a priori.

The primary outcome is the difference in HbA1c between the intervention and the control group at the end of the study. The main analysis will be a linear regression model adjusted for study center and baseline HbA1c. The results will be presented as the mean difference in HbA1c (95% confidence intervals) between groups at the end of study, with corresponding p-values. Missing data will be handled with multiple imputation methods, and the analysis will be accompanied by a complete case analysis. To evaluate the theoretical range of uncertainty due to missing outcome data, a best-worst and worst-best sensitivity analyses will be performed (24). The best-worst-case scenario will be constructed by assuming all dropouts in the intervention group to have an HbA1c at 16 weeks of the study center specific intervention group mean -2SD, and all dropouts in the control group to have an HbA1c of study center specific control group mean +2SD, and vice versa. The same analysis plan will apply to secondary outcome variables. Exploratory post-hoc analysis will include stratified analyses by sex, by BMI (27-30, >30 kg/m<sup>2</sup>), by chronotype (based on MCTQ), and by center to explore potential country- and center-specific differences. Product terms between the

1  
2  
3 intervention and the stratification variable will be included in the models to evaluate potential  
4 interactions. Statistical analyses will be performed using R, and the linear regression models  
5 will be fitted with the `lm()` function.  
6  
7  
8  
9

10 The statistical power calculation is based on the difference in HbA1c between the two groups  
11 (intervention and control) at the end of the study, as the estimated effect. We expect the  
12 starting HbA1c concentration to be approximately 41 mmol/mol with a SD of 6 mmol/mol and  
13 expect a reduction to 38 mmol/mol in the intervention group with small changes in the  
14 control group. Power calculation is based on this between-group difference in the HbA1c  
15 concentrations, with a SD of 6 mmol/mol (assuming similar standard deviations in both  
16 groups) and at a power of 90% and at a significance level of 0.05. To allow for 45% dropouts  
17 and ensure the conditions met, the aim was to recruit 250 participants into the entire  
18 multicenter study: 125 in each treatment group. Assumptions and estimates for the power-  
19 calculation were taken from dietary intervention studies (14, 25) and the calculation was  
20 made with a paired-t test using the `power.t.test()` function from R. The effect size was chosen  
21 to be moderate as this is a single-food intervention study.  
22  
23  
24  
25  
26  
27  
28  
29  
30  
31  
32  
33  
34  
35

## 36 2. Discussion

37 The CarbHealth trial aims to evaluate effectiveness of a beta-glucan-enriched bread i.e.,  
38 whether habitual consumption of a bread containing beta-glucan (>4 g oat beta-glucan per  
39 30 g available carbohydrate) vs a control wheat bread with 66% whole grain wheat under  
40 everyday conditions will affect long term glycemic control among persons at risk for T2D over  
41 a period of 16 weeks.  
42  
43  
44  
45  
46  
47  
48

49 The CarbHealth trial is a pragmatic trial investigating food typically consumed. Participants  
50 replace their habitual bread with study bread, instead of adding or removing food items.  
51 Studies have shown that people are conservative regarding dietary changes (26), thus  
52 swapping a healthier alternative for a habitually consumed foods may be easier than changing  
53 food habits. A bread with 66% wholegrain wheat was chosen as the control bread instead of  
54 refined wheat bread to reflect dietary habits in Northern European countries. Since the  
55 quality of bread and the associated metabolic effects varies substantially (27) use of a medium  
56  
57  
58  
59  
60

1  
2  
3 to low glycemic index-bread rich in beta-glucan may substantially benefit metabolic health.  
4  
5 Whilst complex interventions have been found to substantially reduce progression to  
6  
7 diabetes among persons with pre-diabetes (28), many patients may not be prepared for such  
8  
9 complex changes; thus exchange of bread with a healthier alternative may be more feasible.  
10

11  
12 Nutrition studies often lack statistical power hampering firm conclusions (29, 30). Multicenter  
13  
14 studies may offer a strategy to overcome this shortcoming. Central production and  
15  
16 distribution of the study breads by a third research partner (Nofima) enables this approach.  
17  
18 Furthermore, the multicenter design employed in CarbHealth allows to study the metabolic  
19  
20 effects and the effectiveness of bread against the background of different bread consumption  
21  
22 patterns in the participating countries and to analyze differences in general dietary practices  
23  
24 and potential acceptability. The multicenter study also takes advantage of the expertise of  
25  
26 different groups, thus adding microbiota research, chronotype and continuous glucose  
27  
28 measurements as well as consumer acceptance to the study outcomes. Furthermore,  
29  
30 collaboration with food technologists that were able to produce a beta-glucan enriched bread  
31  
32 is an additional strength of the multicenter study. Additional strengths of the CarbHealth-  
33  
34 study include strong design features such as randomization, double-blinding, and provision of  
35  
36 bread. One limitation of the study is that, due to logistics, breads had to be provided frozen,  
37  
38 which is known to reduce bread quality and could lower consumer acceptance which could  
39  
40 result in a lower compliance.  
41

42 There may be important implications from this research regardless of the findings. If a  
43  
44 beneficial effect was supported by evidence of a positive effect on long term blood glucose  
45  
46 levels among persons with pre-diabetes, public health efforts should be taken to make beta-  
47  
48 glucan-enriched bread available in European countries. This should be accompanied by efforts  
49  
50 to increase the awareness, particularly among persons at risk of T2D, of a simple and effective  
51  
52 replacement. Conversely, if a beneficial effect was not supported this could suggest that the  
53  
54 bread is either not sufficiently enriched with beta-glucans, the beta-glucan has sub-optimal  
55  
56 physiological characteristics e.g. solubility, pre-frozen bread may not be the optimal matrix  
57  
58 for beta-glucan or that the reduction in post-prandial glycemic response achieved with a  
59  
60 similar beta-glucan-enriched bread (31) does not translate into strong long term benefits for  
blood glucose control compared to a wholegrain wheat bread under every-day conditions.

1  
2  
3 Notwithstanding, exploratory sub-group analyses will allow insights into factors determining  
4 responsiveness (e.g., compliance, meal context, consumer acceptance in different  
5 countries/center, sex). Similarly, secondary analyses will inform whether any potential effect  
6 or lack of effectiveness extends to other metabolic parameters.  
7  
8  
9

10  
11  
12 Hence, the results of the CarbHealth study will provide important information on the public  
13 health relevance of a beta-glucan-enriched bread for reduction of post-prandial glycemic  
14 response in persons with pre-diabetes.  
15  
16  
17

### 18 **Patient consent for publication**

19 Not applicable.  
20  
21  
22

### 23 **Declaration of competing interest**

24 All authors state no competing interests.  
25  
26  
27

### 28 **Funding**

29 This project has received funding from the Research Council of Norway, Formas Research  
30 Council of Sweden, the Federal Ministry of Education and Research (Germany) under the  
31 umbrella of the European Joint Programming Initiative “A Healthy Diet for a Healthy Life”  
32 (JPI HDHL) and of the ERA-NET Cofund HDHL INTIMIC (GA N° 727565 of the EU Horizon 2020  
33 Research and Innovation Programme (grant number N/A). The funding agencies did not play  
34 any part in designing the clinical trial.  
35  
36  
37  
38  
39  
40

### 41 **Contributors**

42 TH wrote the first the first draft of the manuscript. JD is the chief investigator of this trial. JD  
43 along with RL, AB, AK, and SB: research question, study design, acquisition of data, obtaining  
44 the funding, implementation of the study protocol, critical revision, and final approval of the  
45 manuscript. TH, HRR, IR, LT, AS, US, KM, KP, AR, VL, PV: feedback of study design,  
46 implementation of study protocol, acquisition of data, critical revision, and final approval of  
47 the manuscript.  
48  
49  
50  
51  
52  
53  
54  
55  
56  
57  
58  
59  
60

## References

1. Leon BM, Maddox TM. Diabetes and cardiovascular disease: Epidemiology, biological mechanisms, treatment recommendations and future research. *World J Diabetes*. 2015;6(13):1246-58.
2. Saeedi P, Petersohn I, Salpea P, Malanda B, Karuranga S, Unwin N, et al. Global and regional diabetes prevalence estimates for 2019 and projections for 2030 and 2045: Results from the International Diabetes Federation Diabetes Atlas, 9th edition. *Diabetes Research and Clinical Practice*. 2019;157:107843.
3. Perreault L, Færch K. Approaching Pre-diabetes. *Journal of Diabetes and its Complications*. 2014;28(2):226-33.
4. World Health Organization WHO. Diabetes 2020 [updated June 8 2020; cited 2020 Sept 28]. Available from: <https://www.who.int/news-room/fact-sheets/detail/diabetes>.
5. International Expert Committee Report on the Role of the A1C Assay in the Diagnosis of Diabetes. *Diabetes Care*. 2009;32(7):1327.
6. International Diabetes Federation IDF. IDF DIABETES ATLAS, 2017. Eighth edition ed2017.
7. Wang YC, McPherson K, Marsh T, Gortmaker SL, Brown M. Health and economic burden of the projected obesity trends in the USA and the UK. *The Lancet*. 2011;378(9793):815-25.
8. Ley SH, Hamdy O, Mohan V, Hu FB. Prevention and management of type 2 diabetes: dietary components and nutritional strategies. *Lancet*. 2014;383(9933):1999-2007.
9. Poutanen KS, Kårlund AO, Gómez-Gallego C, Johansson DP, Scheers NM, Marklinder IM, et al. Grains - a major source of sustainable protein for health. *Nutr Rev*. 2021.
10. Reynolds A, Mann J, Cummings J, Winter N, Mete E, Te Morenga L. Carbohydrate quality and human health: a series of systematic reviews and meta-analyses. *The Lancet*. 2019;393(10170):434-45.
11. Ludwig DS, Hu FB, Tappy L, Brand-Miller J. Dietary carbohydrates: role of quality and quantity in chronic disease. *BMJ*. 2018;361:k2340.
12. Pick ME, Hawrysh ZJ, Gee MI, Toth E. Barley Bread products improve glycemic control of Type 2 subjects. *International Journal of Food Sciences and Nutrition*. 1998;49(1):71-8.
13. Östman EM, Frid AH, Groop LC, Björck IME. A dietary exchange of common bread for tailored bread of low glycaemic index and rich in dietary fibre improved insulin economy in young women with impaired glucose tolerance. *European Journal of Clinical Nutrition*. 2006;60(3):334-41.
14. Tessari P, Lante A. A Multifunctional Bread Rich in Beta Glucans and Low in Starch Improves Metabolic Control in Type 2 Diabetes: A Controlled Trial. *Nutrients*. 2017;9(3).
15. Cicero AFG, Fogacci F, Veronesi M, Strocchi E, Grandi E, Rizzoli E, et al. A Randomized Placebo-Controlled Clinical Trial to Evaluate the Medium-Term Effects of Oat Fibers on Human Health: The Beta-Glucan Effects on Lipid Profile, Glycemia and inTestinal Health (BELT) Study. *Nutrients*. 2020;12(3).
16. Williams B, Mancina G, Spiering W, Agabiti Rosei E, Azizi M, Burnier M, et al.

- 1  
2  
3 2018 ESC/ESH Guidelines for the management of arterial hypertension: The Task Force for  
4 the management of arterial hypertension of the European Society of Cardiology (ESC) and  
5 the European Society of Hypertension (ESH). *European Heart Journal*. 2018;39(33):3021-  
6 104.
- 7  
8 17. Koch SAJ, Conrad J, Cade JE, Weinhold L, Alexy U, Nöthlings U. Validation of the  
9 web-based self-administered 24-h dietary recall myfood24-Germany: comparison with a  
10 weighed dietary record and biomarkers. *European Journal of Nutrition*. 2021;60(7):4069-82.
- 11 18. Koch SAJ, Conrad J, Hierath L, Hancock N, Beer S, Cade JE, et al. Adaptation and  
12 Evaluation of Myfood24-Germany: A Web-Based Self-Administered 24-h Dietary Recall for  
13 the German Adult Population. *Nutrients*. 2020;12(1).
- 14 19. Salvesen L, Engeset D, Øverby NC, Medin AC. Development and evaluation of  
15 image-series for portion size estimation in dietary assessment among adults. *Journal of*  
16 *Nutritional Science*. 2021;10:e3.
- 17 20. Nguyen QC, Wahlgren MB, Almli VL, Varela P. Understanding the role of  
18 dynamic texture perception in consumers' expectations of satiety and satiation. A case  
19 study on barley bread. *Food Quality and Preference*. 2017;62:218-26.
- 20 21. Varela P, Ares G. Sensory profiling, the blurred line between sensory and  
21 consumer science. A review of novel methods for product characterization. *Food Research*  
22 *International*. 2012;48(2):893-908.
- 23 22. Craig CL, Marshall AL, Sjöström M, Bauman AE, Booth ML, Ainsworth BE, et al.  
24 International physical activity questionnaire: 12-country reliability and validity. *Medicine &*  
25 *science in sports & exercise*. 2003;35(8):1381-95.
- 26 23. Roenneberg T, Wirz-Justice A, Mero M. Life between clocks: daily temporal  
27 patterns of human chronotypes. *Journal of biological rhythms*. 2003;18(1):80-90.
- 28 24. Jakobsen JC, Gluud C, Wetterslev J, Winkel P. When and how should multiple  
29 imputation be used for handling missing data in randomised clinical trials – a practical guide  
30 with flowcharts. *BMC Medical Research Methodology*. 2017;17(1):162.
- 31 25. Cole RE, Boyer KM, Spanbauer SM, Sprague D, Bingham M. Effectiveness of  
32 Prediabetes Nutrition Shared Medical Appointments: Prevention of Diabetes. *The Diabetes*  
33 *Educator*. 2013;39(3):344-53.
- 34 26. Shepherd R. Resistance to changes in diet. *Proceedings of the nutrition society*.  
35 2002;61(2):267-72.
- 36 27. Goletzke J, Atkinson FS, Ek KL, Bell K, Brand-Miller JC, Buyken AE. Glycaemic  
37 and insulin index of four common German breads. *Eur J Clin Nutr*. 2016;70(7):808-11.
- 38 28. Tuomilehto J, Lindström J, Eriksson JG, Valle TT, Hämäläinen H, Ilanne-Parikka  
39 P, et al. Prevention of type 2 diabetes mellitus by changes in lifestyle among subjects with  
40 impaired glucose tolerance. *New England Journal of Medicine*. 2001;344(18):1343-50.
- 41 29. Kroeger CM, Garza C, Lynch CJ, Myers E, Rowe S, Schneeman BO, et al.  
42 Scientific rigor and credibility in the nutrition research landscape. *The American Journal of*  
43 *Clinical Nutrition*. 2018;107(3):484-94.
- 44 30. Vorland CJ, Brown AW, Dawson JA, Dickinson SL, Golzarri-Arroyo L, Hannon BA,  
45 et al. Errors in the implementation, analysis, and reporting of randomization within obesity  
46 and nutrition research: a guide to their avoidance. *International Journal of Obesity*.  
47 2021;45(11):2335-46.
- 48 31. Rieder A, Knutsen SH, Sainz Fernandez A, Ballance S. At a high dose even  
49 partially degraded beta-glucan with decreased solubility significantly reduced the glycaemic  
50 response to bread. *Food & Function*. 2019;10(3):1529-39.
- 51  
52  
53  
54  
55  
56  
57  
58  
59  
60



1  
2  
3  
4  
5  
6 **Figure Legend**  
7

8 **Figure 1.** Flowchart over the study visits in CarbHealth multicenter study.  
9  
10  
11  
12  
13  
14  
15  
16  
17  
18  
19  
20  
21  
22  
23  
24  
25  
26  
27  
28  
29  
30  
31  
32  
33  
34  
35  
36  
37  
38  
39  
40  
41  
42  
43  
44  
45  
46  
47  
48  
49  
50  
51  
52  
53  
54  
55  
56  
57  
58  
59  
60

For peer review only

1  
2  
3  
4  
5  
6  
7  
8  
9  
10  
11  
12  
13  
14  
15  
16  
17  
18  
19  
20  
21  
22  
23  
24  
25  
26  
27  
28  
29  
30  
31  
32  
33  
34  
35  
36  
37  
38  
39  
40  
41  
42  
43  
44  
45  
46  
47  
48  
49  
50  
51  
52  
53  
54  
55  
56  
57  
58  
59  
60

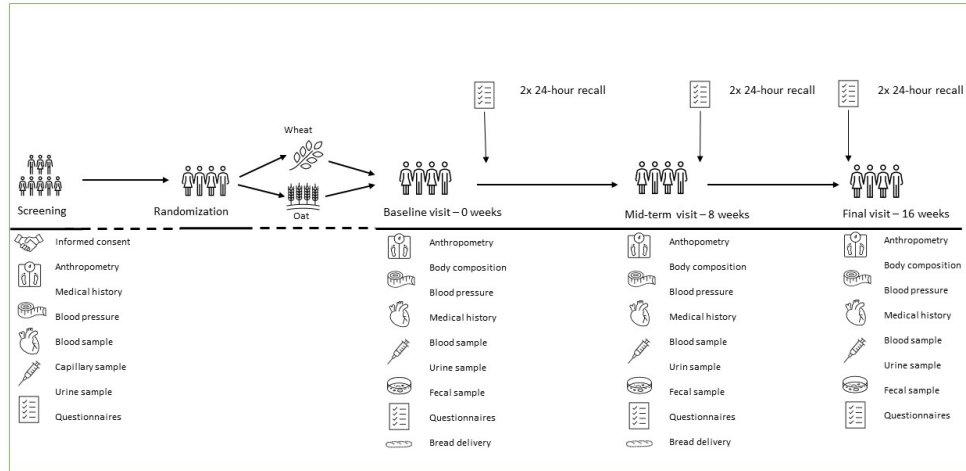

Figure 1. Flowchart over the study visits in CarbHealth multicenter study.

338x190mm (96 x 96 DPI)

# Reporting checklist for protocol of a clinical trial.

Based on the SPIRIT guidelines.

## Instructions to authors

Complete this checklist by entering the page numbers from your manuscript where readers will find each of the items listed below.

Your article may not currently address all the items on the checklist. Please modify your text to include the missing information. If you are certain that an item does not apply, please write "n/a" and provide a short explanation.

Upload your completed checklist as an extra file when you submit to a journal.

In your methods section, say that you used the SPIRIT reporting guidelines, and cite them as:

Chan A-W, Tetzlaff JM, Gøtzsche PC, Altman DG, Mann H, Berlin J, Dickersin K, Hróbjartsson A, Schulz KF, Parulekar WR, Krleža-Jerić K, Laupacis A, Moher D. SPIRIT 2013 Explanation and Elaboration: Guidance for protocols of clinical trials. *BMJ*. 2013;346:e7586

|                                   |                                                                                                                                 | Page   |
|-----------------------------------|---------------------------------------------------------------------------------------------------------------------------------|--------|
|                                   | Reporting Item                                                                                                                  | Number |
| <b>Administrative information</b> |                                                                                                                                 |        |
| Title                             | <a href="#">#1</a> Descriptive title identifying the study design, population, interventions, and, if applicable, trial acronym | 1      |

|    |                     |                     |                                                            |         |
|----|---------------------|---------------------|------------------------------------------------------------|---------|
| 1  | Trial registration  | <a href="#">#2a</a> | Trial identifier and registry name. If not yet registered, | 6       |
| 2  |                     |                     |                                                            |         |
| 3  |                     |                     |                                                            |         |
| 4  |                     |                     | name of intended registry                                  |         |
| 5  |                     |                     |                                                            |         |
| 6  | Trial registration: | <a href="#">#2b</a> | All items from the World Health Organization Trial         | N/A     |
| 7  |                     |                     |                                                            |         |
| 8  | data set            |                     | Registration Data Set                                      |         |
| 9  |                     |                     |                                                            |         |
| 10 |                     |                     |                                                            |         |
| 11 | Protocol version    | <a href="#">#3</a>  | Date and version identifier                                | N/A     |
| 12 |                     |                     |                                                            |         |
| 13 |                     |                     |                                                            |         |
| 14 |                     |                     |                                                            |         |
| 15 | Funding             | <a href="#">#4</a>  | Sources and types of financial, material, and other        | 17      |
| 16 |                     |                     |                                                            |         |
| 17 |                     |                     | support                                                    |         |
| 18 |                     |                     |                                                            |         |
| 19 |                     |                     |                                                            |         |
| 20 | Roles and           | <a href="#">#5a</a> | Names, affiliations, and roles of protocol contributors    | 1 , 17- |
| 21 |                     |                     |                                                            |         |
| 22 | responsibilities:   |                     |                                                            | 18      |
| 23 |                     |                     |                                                            |         |
| 24 | contributorship     |                     |                                                            |         |
| 25 |                     |                     |                                                            |         |
| 26 |                     |                     |                                                            |         |
| 27 |                     |                     |                                                            |         |
| 28 | Roles and           | <a href="#">#5b</a> | Name and contact information for the trial sponsor         | N/A     |
| 29 |                     |                     |                                                            |         |
| 30 | responsibilities:   |                     |                                                            |         |
| 31 |                     |                     |                                                            |         |
| 32 | sponsor contact     |                     |                                                            |         |
| 33 |                     |                     |                                                            |         |
| 34 | information         |                     |                                                            |         |
| 35 |                     |                     |                                                            |         |
| 36 |                     |                     |                                                            |         |
| 37 |                     |                     |                                                            |         |
| 38 | Roles and           | <a href="#">#5c</a> | Role of study sponsor and funders, if any, in study        | 17      |
| 39 |                     |                     |                                                            |         |
| 40 | responsibilities:   |                     | design; collection, management, analysis, and              |         |
| 41 |                     |                     |                                                            |         |
| 42 | sponsor and funder  |                     | interpretation of data; writing of the report; and the     |         |
| 43 |                     |                     |                                                            |         |
| 44 |                     |                     | decision to submit the report for publication, including   |         |
| 45 |                     |                     |                                                            |         |
| 46 |                     |                     | whether they will have ultimate authority over any of      |         |
| 47 |                     |                     |                                                            |         |
| 48 |                     |                     | these activities                                           |         |
| 49 |                     |                     |                                                            |         |
| 50 |                     |                     |                                                            |         |
| 51 |                     |                     |                                                            |         |
| 52 | Roles and           | <a href="#">#5d</a> | Composition, roles, and responsibilities of the            | N/A     |
| 53 |                     |                     |                                                            |         |
| 54 | responsibilities:   |                     | coordinating centre, steering committee, endpoint          |         |
| 55 |                     |                     |                                                            |         |
| 56 | committees          |                     | adjudication committee, data management team, and          |         |
| 57 |                     |                     |                                                            |         |
| 58 |                     |                     |                                                            |         |
| 59 |                     |                     |                                                            |         |
| 60 |                     |                     |                                                            |         |

1 other individuals or groups overseeing the trial, if  
 2  
 3 applicable (see Item 21a for data monitoring committee)  
 4  
 5

## 6 Introduction

7  
 8  
 9 Background and [#6a](#) Description of research question and justification for 5  
 10  
 11 rationale undertaking the trial, including summary of relevant  
 12  
 13 studies (published and unpublished) examining benefits  
 14  
 15 and harms for each intervention  
 16  
 17

18  
 19 Background and [#6b](#) Explanation for choice of comparators 5  
 20  
 21 rationale: choice of  
 22  
 23 comparators  
 24  
 25

26 Objectives [#7](#) Specific objectives or hypotheses 5-6  
 27  
 28

29 Trial design [#8](#) Description of trial design including type of trial (eg, 6  
 30  
 31 parallel group, crossover, factorial, single group),  
 32  
 33 allocation ratio, and framework (eg, superiority,  
 34  
 35 equivalence, non-inferiority, exploratory)  
 36  
 37  
 38

## 39 Methods:

40  
 41 Participants,  
 42  
 43 interventions, and  
 44  
 45 outcomes  
 46  
 47  
 48

49 Study setting [#9](#) Description of study settings (eg, community clinic, 6  
 50  
 51 academic hospital) and list of countries where data will be  
 52  
 53 collected. Reference to where list of study sites can be  
 54  
 55 obtained  
 56  
 57  
 58  
 59  
 60

|    |                      |                      |                                                              |     |
|----|----------------------|----------------------|--------------------------------------------------------------|-----|
| 1  | Eligibility criteria | <a href="#">#10</a>  | Inclusion and exclusion criteria for participants. If        | 8   |
| 2  |                      |                      |                                                              |     |
| 3  |                      |                      | applicable, eligibility criteria for study centres and       |     |
| 4  |                      |                      | individuals who will perform the interventions (eg,          |     |
| 5  |                      |                      | surgeons, psychotherapists)                                  |     |
| 6  |                      |                      |                                                              |     |
| 7  |                      |                      |                                                              |     |
| 8  |                      |                      |                                                              |     |
| 9  |                      |                      |                                                              |     |
| 10 |                      |                      |                                                              |     |
| 11 | Interventions:       | <a href="#">#11a</a> | Interventions for each group with sufficient detail to allow | 6-7 |
| 12 |                      |                      |                                                              |     |
| 13 | description          |                      | replication, including how and when they will be             |     |
| 14 |                      |                      | administered                                                 |     |
| 15 |                      |                      |                                                              |     |
| 16 |                      |                      |                                                              |     |
| 17 |                      |                      |                                                              |     |
| 18 |                      |                      |                                                              |     |
| 19 | Interventions:       | <a href="#">#11b</a> | Criteria for discontinuing or modifying allocated            | 7   |
| 20 |                      |                      |                                                              |     |
| 21 | modifications        |                      | interventions for a given trial participant (eg, drug dose   |     |
| 22 |                      |                      | change in response to harms, participant request, or         |     |
| 23 |                      |                      | improving / worsening disease)                               |     |
| 24 |                      |                      |                                                              |     |
| 25 |                      |                      |                                                              |     |
| 26 |                      |                      |                                                              |     |
| 27 |                      |                      |                                                              |     |
| 28 |                      |                      |                                                              |     |
| 29 | Interventions:       | <a href="#">#11c</a> | Strategies to improve adherence to intervention protocols,   | N/A |
| 30 |                      |                      |                                                              |     |
| 31 | adherence            |                      | and any procedures for monitoring adherence (eg, drug        |     |
| 32 |                      |                      | tablet return; laboratory tests)                             |     |
| 33 |                      |                      |                                                              |     |
| 34 |                      |                      |                                                              |     |
| 35 |                      |                      |                                                              |     |
| 36 | Interventions:       | <a href="#">#11d</a> | Relevant concomitant care and interventions that are         | 6-7 |
| 37 |                      |                      |                                                              |     |
| 38 | concomitant care     |                      | permitted or prohibited during the trial                     |     |
| 39 |                      |                      |                                                              |     |
| 40 |                      |                      |                                                              |     |
| 41 |                      |                      |                                                              |     |
| 42 | Outcomes             | <a href="#">#12</a>  | Primary, secondary, and other outcomes, including the        | 14  |
| 43 |                      |                      | specific measurement variable (eg, systolic blood            |     |
| 44 |                      |                      | pressure), analysis metric (eg, change from baseline, final  |     |
| 45 |                      |                      | value, time to event), method of aggregation (eg, median,    |     |
| 46 |                      |                      | proportion), and time point for each outcome. Explanation    |     |
| 47 |                      |                      | of the clinical relevance of chosen efficacy and harm        |     |
| 48 |                      |                      | outcomes is strongly recommended                             |     |
| 49 |                      |                      |                                                              |     |
| 50 |                      |                      |                                                              |     |
| 51 |                      |                      |                                                              |     |
| 52 |                      |                      |                                                              |     |
| 53 |                      |                      |                                                              |     |
| 54 |                      |                      |                                                              |     |
| 55 |                      |                      |                                                              |     |
| 56 |                      |                      |                                                              |     |
| 57 |                      |                      |                                                              |     |
| 58 |                      |                      |                                                              |     |
| 59 |                      |                      |                                                              |     |
| 60 |                      |                      |                                                              |     |

|    |                           |                      |                                                            |     |
|----|---------------------------|----------------------|------------------------------------------------------------|-----|
| 1  | Participant timeline      | <a href="#">#13</a>  | Time schedule of enrolment, interventions (including any   | 6-7 |
| 2  |                           |                      | run-ins and washouts), assessments, and visits for         |     |
| 3  |                           |                      | participants. A schematic diagram is highly recommended    |     |
| 4  |                           |                      | (see Figure)                                               |     |
| 5  |                           |                      |                                                            |     |
| 6  |                           |                      |                                                            |     |
| 7  |                           |                      |                                                            |     |
| 8  |                           |                      |                                                            |     |
| 9  |                           |                      |                                                            |     |
| 10 |                           |                      |                                                            |     |
| 11 | Sample size               | <a href="#">#14</a>  | Estimated number of participants needed to achieve         | 15  |
| 12 |                           |                      | study objectives and how it was determined, including      |     |
| 13 |                           |                      | clinical and statistical assumptions supporting any sample |     |
| 14 |                           |                      | size calculations                                          |     |
| 15 |                           |                      |                                                            |     |
| 16 |                           |                      |                                                            |     |
| 17 |                           |                      |                                                            |     |
| 18 |                           |                      |                                                            |     |
| 19 |                           |                      |                                                            |     |
| 20 |                           |                      |                                                            |     |
| 21 | Recruitment               | <a href="#">#15</a>  | Strategies for achieving adequate participant enrolment to | 9   |
| 22 |                           |                      | reach target sample size                                   |     |
| 23 |                           |                      |                                                            |     |
| 24 |                           |                      |                                                            |     |
| 25 |                           |                      |                                                            |     |
| 26 | <b>Methods:</b>           |                      |                                                            |     |
| 27 |                           |                      |                                                            |     |
| 28 | <b>Assignment of</b>      |                      |                                                            |     |
| 29 | <b>interventions (for</b> |                      |                                                            |     |
| 30 | <b>controlled trials)</b> |                      |                                                            |     |
| 31 |                           |                      |                                                            |     |
| 32 |                           |                      |                                                            |     |
| 33 |                           |                      |                                                            |     |
| 34 |                           |                      |                                                            |     |
| 35 |                           |                      |                                                            |     |
| 36 | Allocation: sequence      | <a href="#">#16a</a> | Method of generating the allocation sequence (eg,          | 9   |
| 37 | generation                |                      | computer-generated random numbers), and list of any        |     |
| 38 |                           |                      | factors for stratification. To reduce predictability of a  |     |
| 39 |                           |                      | random sequence, details of any planned restriction (eg,   |     |
| 40 |                           |                      | blocking) should be provided in a separate document that   |     |
| 41 |                           |                      | is unavailable to those who enrol participants or assign   |     |
| 42 |                           |                      | interventions                                              |     |
| 43 |                           |                      |                                                            |     |
| 44 |                           |                      |                                                            |     |
| 45 |                           |                      |                                                            |     |
| 46 |                           |                      |                                                            |     |
| 47 |                           |                      |                                                            |     |
| 48 |                           |                      |                                                            |     |
| 49 |                           |                      |                                                            |     |
| 50 |                           |                      |                                                            |     |
| 51 |                           |                      |                                                            |     |
| 52 |                           |                      |                                                            |     |
| 53 | Allocation                | <a href="#">#16b</a> | Mechanism of implementing the allocation sequence (eg,     | 9   |
| 54 | concealment               |                      | central telephone; sequentially numbered, opaque,          |     |
| 55 |                           |                      |                                                            |     |
| 56 |                           |                      |                                                            |     |
| 57 |                           |                      |                                                            |     |
| 58 | mechanism                 |                      |                                                            |     |
| 59 |                           |                      |                                                            |     |
| 60 |                           |                      |                                                            |     |

sealed envelopes), describing any steps to conceal the sequence until interventions are assigned

Allocation: [#16c](#) Who will generate the allocation sequence, who will enrol participants, and who will assign participants to interventions 9

Blinding (masking) [#17a](#) Who will be blinded after assignment to interventions (eg, trial participants, care providers, outcome assessors, data analysts), and how 9

Blinding (masking): [#17b](#) If blinded, circumstances under which unblinding is permissible, and procedure for revealing a participant's allocated intervention during the trial N/A

**Methods: Data collection, management, and analysis**

Data collection plan [#18a](#) Plans for assessment and collection of outcome, baseline, and other trial data, including any related processes to promote data quality (eg, duplicate measurements, training of assessors) and a description of study instruments (eg, questionnaires, laboratory tests) along with their reliability and validity, if known. Reference to where data collection forms can be found, if not in the protocol 10-15



|    |                            |                      |                                                                |     |
|----|----------------------------|----------------------|----------------------------------------------------------------|-----|
| 1  | Data collection plan:      | <a href="#">#18b</a> | Plans to promote participant retention and complete            | N/A |
| 2  |                            |                      |                                                                |     |
| 3  | retention                  |                      | follow-up, including list of any outcome data to be            |     |
| 4  |                            |                      | collected for participants who discontinue or deviate from     |     |
| 5  |                            |                      | intervention protocols                                         |     |
| 6  |                            |                      |                                                                |     |
| 7  |                            |                      |                                                                |     |
| 8  |                            |                      |                                                                |     |
| 9  |                            |                      |                                                                |     |
| 10 |                            |                      |                                                                |     |
| 11 | Data management            | <a href="#">#19</a>  | Plans for data entry, coding, security, and storage,           | N/A |
| 12 |                            |                      | including any related processes to promote data quality        |     |
| 13 |                            |                      | (eg, double data entry; range checks for data values).         |     |
| 14 |                            |                      | Reference to where details of data management                  |     |
| 15 |                            |                      | procedures can be found, if not in the protocol                |     |
| 16 |                            |                      |                                                                |     |
| 17 |                            |                      |                                                                |     |
| 18 | Statistics: outcomes       | <a href="#">#20a</a> | Statistical methods for analysing primary and secondary        | 14  |
| 19 |                            |                      | outcomes. Reference to where other details of the              |     |
| 20 |                            |                      | statistical analysis plan can be found, if not in the protocol |     |
| 21 |                            |                      |                                                                |     |
| 22 |                            |                      |                                                                |     |
| 23 | Statistics: additional     | <a href="#">#20b</a> | Methods for any additional analyses (eg, subgroup and          | 14  |
| 24 |                            |                      | adjusted analyses)                                             |     |
| 25 | analyses                   |                      |                                                                |     |
| 26 |                            |                      |                                                                |     |
| 27 |                            |                      |                                                                |     |
| 28 | Statistics: analysis       | <a href="#">#20c</a> | Definition of analysis population relating to protocol non-    | 14  |
| 29 |                            |                      | adherence (eg, as randomised analysis), and any                |     |
| 30 | population and             |                      | statistical methods to handle missing data (eg, multiple       |     |
| 31 | missing data               |                      | imputation)                                                    |     |
| 32 |                            |                      |                                                                |     |
| 33 |                            |                      |                                                                |     |
| 34 |                            |                      |                                                                |     |
| 35 |                            |                      |                                                                |     |
| 36 | <b>Methods: Monitoring</b> |                      |                                                                |     |
| 37 |                            |                      |                                                                |     |
| 38 |                            |                      |                                                                |     |
| 39 | Data monitoring:           | <a href="#">#21a</a> | Composition of data monitoring committee (DMC);                | N/A |
| 40 |                            |                      | summary of its role and reporting structure; statement of      |     |
| 41 | formal committee           |                      | whether it is independent from the sponsor and                 |     |
| 42 |                            |                      | competing interests; and reference to where further            |     |
| 43 |                            |                      |                                                                |     |
| 44 |                            |                      |                                                                |     |
| 45 |                            |                      |                                                                |     |
| 46 |                            |                      |                                                                |     |
| 47 |                            |                      |                                                                |     |
| 48 |                            |                      |                                                                |     |
| 49 |                            |                      |                                                                |     |
| 50 |                            |                      |                                                                |     |
| 51 |                            |                      |                                                                |     |
| 52 |                            |                      |                                                                |     |
| 53 |                            |                      |                                                                |     |
| 54 |                            |                      |                                                                |     |
| 55 |                            |                      |                                                                |     |
| 56 |                            |                      |                                                                |     |
| 57 |                            |                      |                                                                |     |
| 58 |                            |                      |                                                                |     |
| 59 |                            |                      |                                                                |     |
| 60 |                            |                      |                                                                |     |

1 details about its charter can be found, if not in the  
 2  
 3 protocol. Alternatively, an explanation of why a DMC is  
 4  
 5 not needed  
 6  
 7

|    |                      |                      |                                                              |     |
|----|----------------------|----------------------|--------------------------------------------------------------|-----|
| 8  | Data monitoring:     | <a href="#">#21b</a> | Description of any interim analyses and stopping             | N/A |
| 9  |                      |                      |                                                              |     |
| 10 | interim analysis     |                      | guidelines, including who will have access to these          |     |
| 11 |                      |                      |                                                              |     |
| 12 |                      |                      | interim results and make the final decision to terminate     |     |
| 13 |                      |                      |                                                              |     |
| 14 |                      |                      | the trial                                                    |     |
| 15 |                      |                      |                                                              |     |
| 16 |                      |                      |                                                              |     |
| 17 |                      |                      |                                                              |     |
| 18 | Harms                | <a href="#">#22</a>  | Plans for collecting, assessing, reporting, and managing     | N/A |
| 19 |                      |                      |                                                              |     |
| 20 |                      |                      | solicited and spontaneously reported adverse events and      |     |
| 21 |                      |                      |                                                              |     |
| 22 |                      |                      | other unintended effects of trial interventions or trial     |     |
| 23 |                      |                      |                                                              |     |
| 24 |                      |                      | conduct                                                      |     |
| 25 |                      |                      |                                                              |     |
| 26 |                      |                      |                                                              |     |
| 27 |                      |                      |                                                              |     |
| 28 | Auditing             | <a href="#">#23</a>  | Frequency and procedures for auditing trial conduct, if      | N/A |
| 29 |                      |                      |                                                              |     |
| 30 |                      |                      | any, and whether the process will be independent from        |     |
| 31 |                      |                      |                                                              |     |
| 32 |                      |                      | investigators and the sponsor                                |     |
| 33 |                      |                      |                                                              |     |
| 34 |                      |                      |                                                              |     |
| 35 | <b>Ethics and</b>    |                      |                                                              |     |
| 36 |                      |                      |                                                              |     |
| 37 | <b>dissemination</b> |                      |                                                              |     |
| 38 |                      |                      |                                                              |     |
| 39 |                      |                      |                                                              |     |
| 40 |                      |                      |                                                              |     |
| 41 | Research ethics      | <a href="#">#24</a>  | Plans for seeking research ethics committee / institutional  | 6   |
| 42 |                      |                      |                                                              |     |
| 43 | approval             |                      | review board (REC / IRB) approval                            |     |
| 44 |                      |                      |                                                              |     |
| 45 |                      |                      |                                                              |     |
| 46 | Protocol             | <a href="#">#25</a>  | Plans for communicating important protocol modifications     | N/A |
| 47 |                      |                      |                                                              |     |
| 48 | amendments           |                      | (eg, changes to eligibility criteria, outcomes, analyses) to |     |
| 49 |                      |                      |                                                              |     |
| 50 |                      |                      | relevant parties (eg, investigators, REC / IRBs, trial       |     |
| 51 |                      |                      |                                                              |     |
| 52 |                      |                      | participants, trial registries, journals, regulators)        |     |
| 53 |                      |                      |                                                              |     |
| 54 |                      |                      |                                                              |     |
| 55 |                      |                      |                                                              |     |
| 56 |                      |                      |                                                              |     |
| 57 |                      |                      |                                                              |     |
| 58 |                      |                      |                                                              |     |
| 59 |                      |                      |                                                              |     |
| 60 |                      |                      |                                                              |     |

|    |                       |                      |                                                                |     |
|----|-----------------------|----------------------|----------------------------------------------------------------|-----|
| 1  | Consent or assent     | <a href="#">#26a</a> | Who will obtain informed consent or assent from potential      | 9   |
| 2  |                       |                      | trial participants or authorised surrogates, and how (see      |     |
| 3  |                       |                      | Item 32)                                                       |     |
| 4  |                       |                      |                                                                |     |
| 5  |                       |                      |                                                                |     |
| 6  |                       |                      |                                                                |     |
| 7  |                       |                      |                                                                |     |
| 8  |                       |                      |                                                                |     |
| 9  | Consent or assent:    | <a href="#">#26b</a> | Additional consent provisions for collection and use of        | N/A |
| 10 | ancillary studies     |                      | participant data and biological specimens in ancillary         |     |
| 11 |                       |                      | studies, if applicable                                         |     |
| 12 |                       |                      |                                                                |     |
| 13 |                       |                      |                                                                |     |
| 14 |                       |                      |                                                                |     |
| 15 |                       |                      |                                                                |     |
| 16 | Confidentiality       | <a href="#">#27</a>  | How personal information about potential and enrolled          | N/A |
| 17 |                       |                      | participants will be collected, shared, and maintained in      |     |
| 18 |                       |                      | order to protect confidentiality before, during, and after     |     |
| 19 |                       |                      | the trial                                                      |     |
| 20 |                       |                      |                                                                |     |
| 21 |                       |                      |                                                                |     |
| 22 |                       |                      |                                                                |     |
| 23 |                       |                      |                                                                |     |
| 24 |                       |                      |                                                                |     |
| 25 |                       |                      |                                                                |     |
| 26 | Declaration of        | <a href="#">#28</a>  | Financial and other competing interests for principal          | 17  |
| 27 | interests             |                      | investigators for the overall trial and each study site        |     |
| 28 |                       |                      |                                                                |     |
| 29 |                       |                      |                                                                |     |
| 30 |                       |                      |                                                                |     |
| 31 | Data access           | <a href="#">#29</a>  | Statement of who will have access to the final trial           | N/A |
| 32 |                       |                      | dataset, and disclosure of contractual agreements that         |     |
| 33 |                       |                      | limit such access for investigators                            |     |
| 34 |                       |                      |                                                                |     |
| 35 |                       |                      |                                                                |     |
| 36 |                       |                      |                                                                |     |
| 37 |                       |                      |                                                                |     |
| 38 |                       |                      |                                                                |     |
| 39 | Ancillary and post    | <a href="#">#30</a>  | Provisions, if any, for ancillary and post-trial care, and for | N/A |
| 40 | trial care            |                      | compensation to those who suffer harm from trial               |     |
| 41 |                       |                      | participation                                                  |     |
| 42 |                       |                      |                                                                |     |
| 43 |                       |                      |                                                                |     |
| 44 |                       |                      |                                                                |     |
| 45 |                       |                      |                                                                |     |
| 46 |                       |                      |                                                                |     |
| 47 | Dissemination policy: | <a href="#">#31a</a> | Plans for investigators and sponsor to communicate trial       | N/A |
| 48 | trial results         |                      | results to participants, healthcare professionals, the         |     |
| 49 |                       |                      | public, and other relevant groups (eg, via publication,        |     |
| 50 |                       |                      | reporting in results databases, or other data sharing          |     |
| 51 |                       |                      | arrangements), including any publication restrictions          |     |
| 52 |                       |                      |                                                                |     |
| 53 |                       |                      |                                                                |     |
| 54 |                       |                      |                                                                |     |
| 55 |                       |                      |                                                                |     |
| 56 |                       |                      |                                                                |     |
| 57 |                       |                      |                                                                |     |
| 58 |                       |                      |                                                                |     |
| 59 |                       |                      |                                                                |     |
| 60 |                       |                      |                                                                |     |

1 Dissemination policy: [#31b](#) Authorship eligibility guidelines and any intended use of N/A  
2  
3 authorship professional writers  
4  
5

6 Dissemination policy: [#31c](#) Plans, if any, for granting public access to the full N/A  
7  
8 reproducible protocol, participant-level dataset, and statistical code  
9  
10 research  
11  
12

## 13 Appendices

14  
15  
16  
17 Informed consent [#32](#) Model consent form and other related documentation N/A  
18  
19 materials given to participants and authorised surrogates  
20  
21

22  
23 Biological specimens [#33](#) Plans for collection, laboratory evaluation, and storage of N/A  
24  
25 biological specimens for genetic or molecular analysis in  
26  
27 the current trial and for future use in ancillary studies, if  
28  
29 applicable  
30  
31

32  
33 The SPIRIT Explanation and Elaboration paper is distributed under the terms of the Creative  
34  
35 Commons Attribution License CC-BY-NC. This checklist was completed on 15. February 2022 using  
36  
37 <https://www.goodreports.org/>, a tool made by the [EQUATOR Network](#) in collaboration with  
38  
39 [Penelope.ai](#)  
40  
41  
42  
43  
44  
45  
46  
47  
48  
49  
50  
51  
52  
53  
54  
55  
56  
57  
58  
59  
60
